# Supplementary material for: Legionella pneumophila modulates host energy metabolism by ADP-ribosylation of ADP/ATP translocases
Source: eLife journal article supplement (doi:10.7554/elife.73611), 2022-01-27

Figure 1E source data

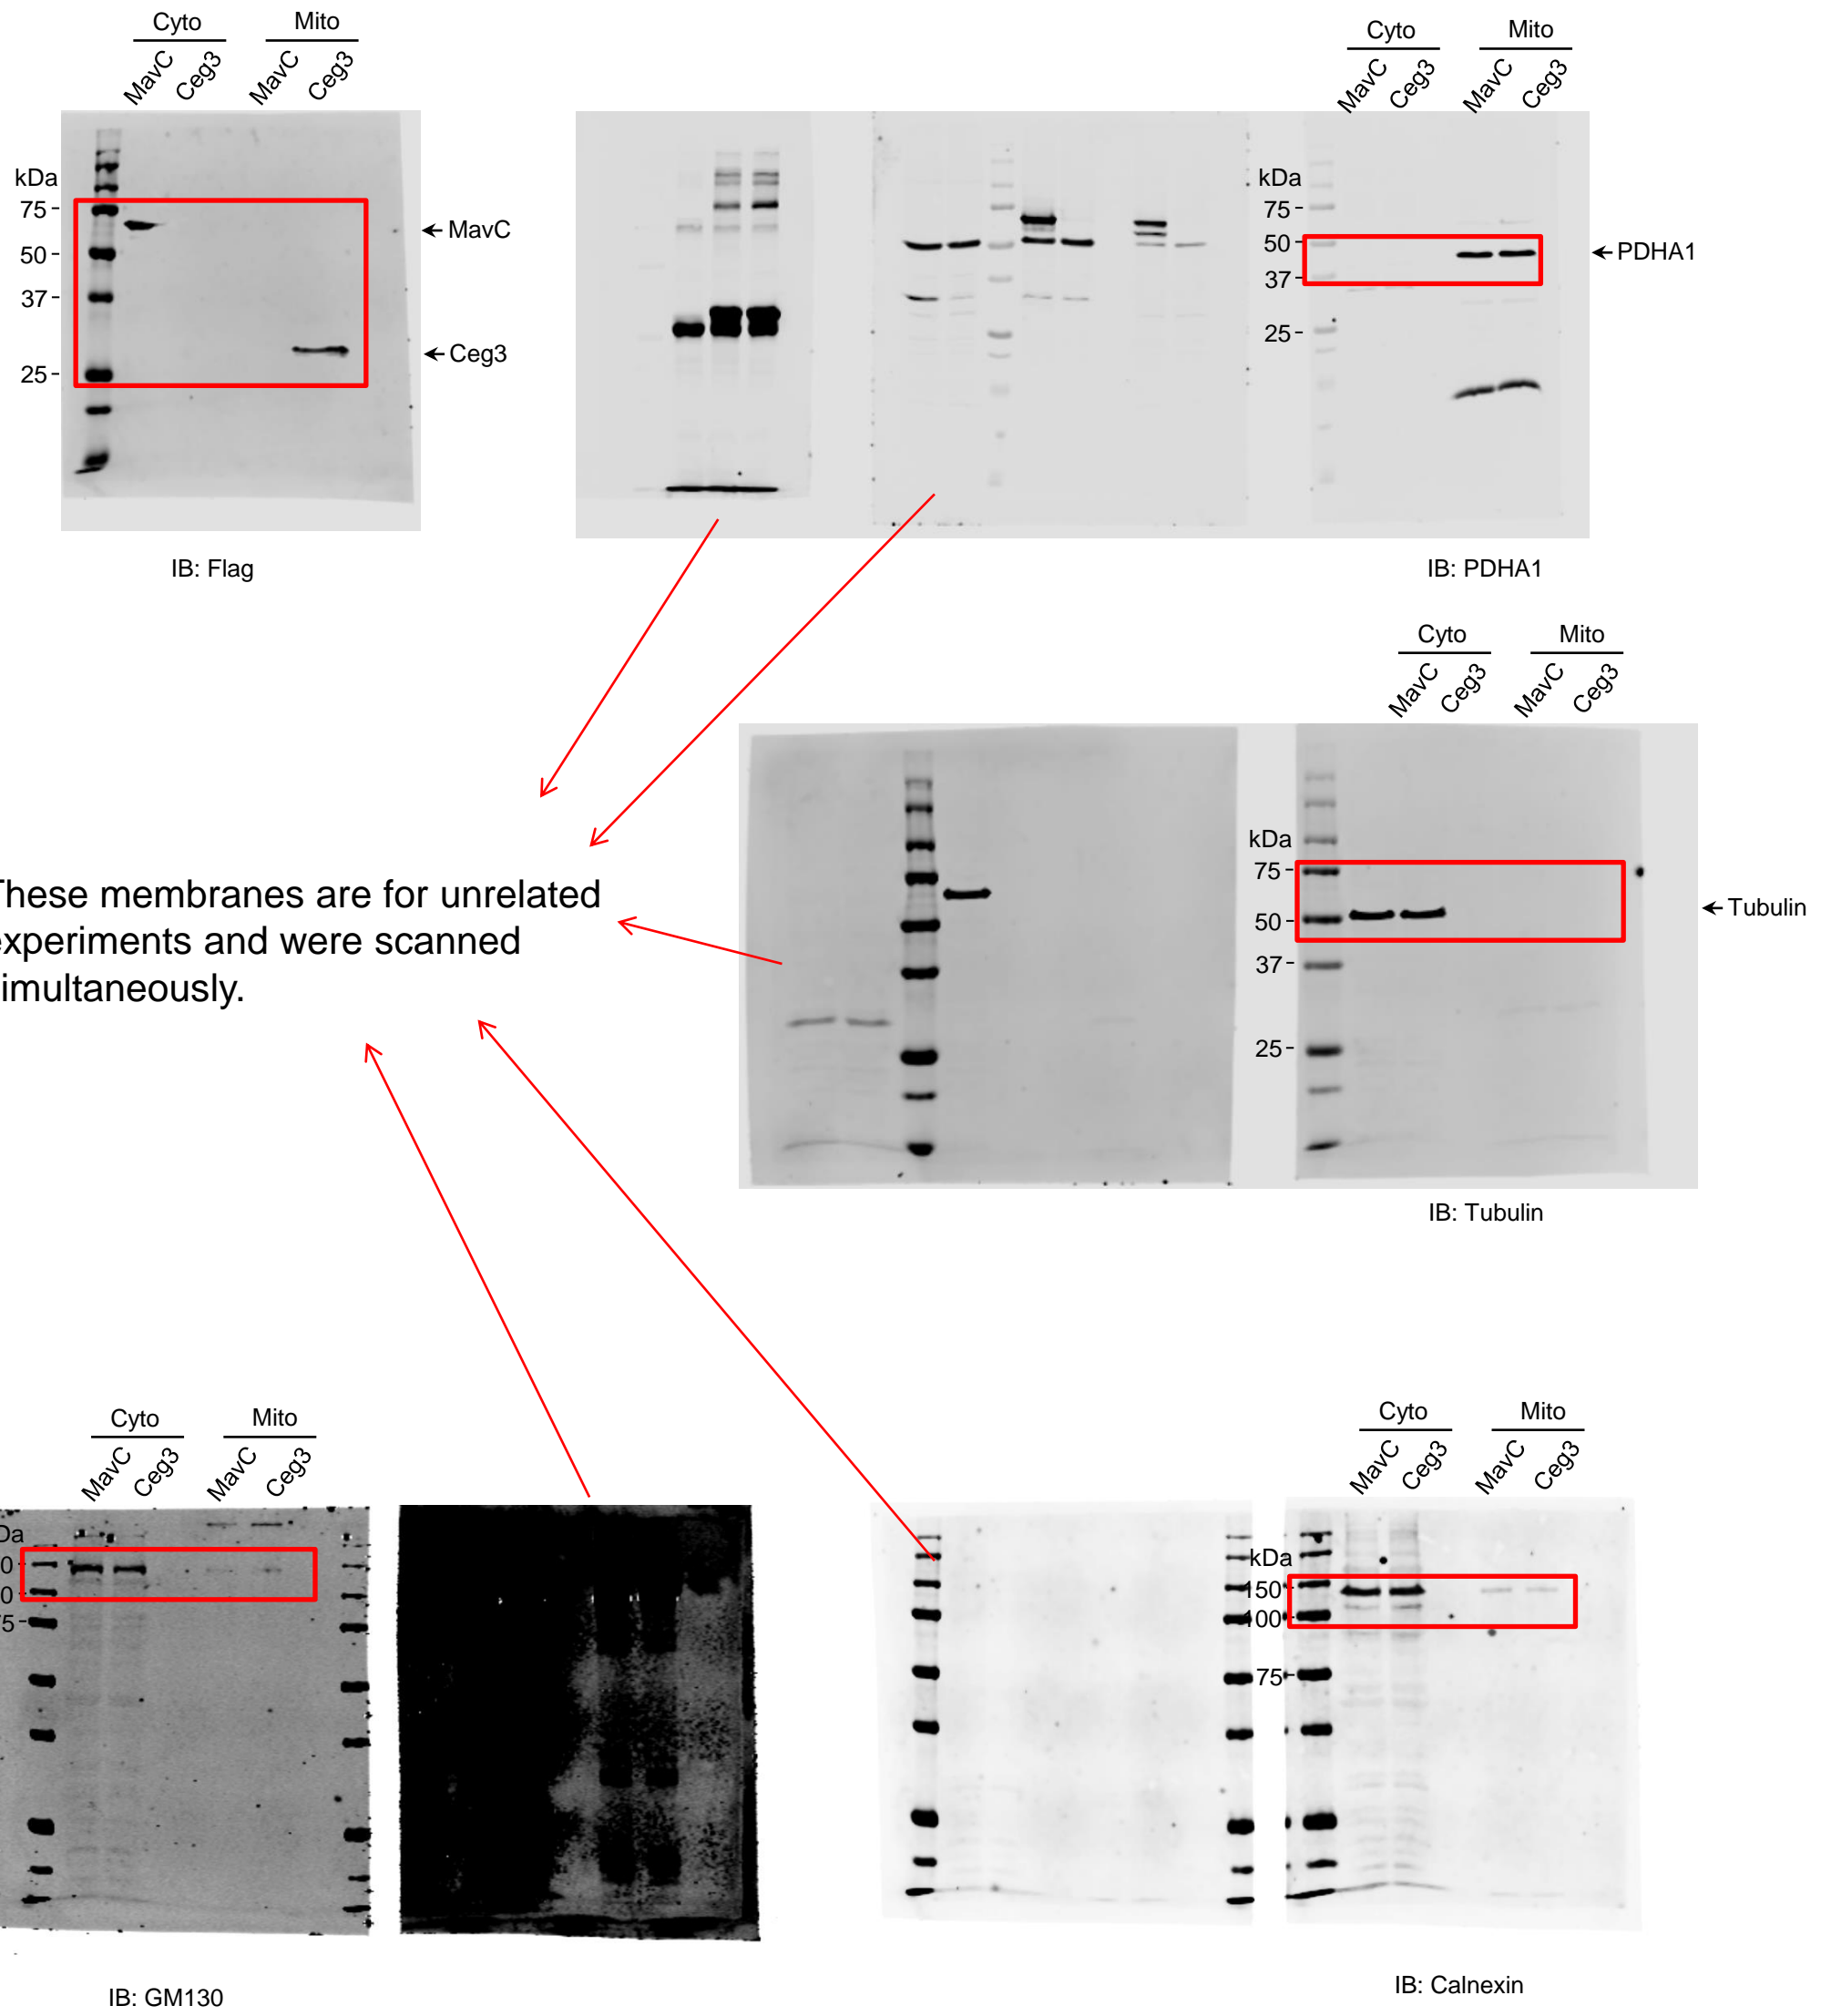

Figure 1F source data

pCeg3  
dotA<sup>-</sup> WT

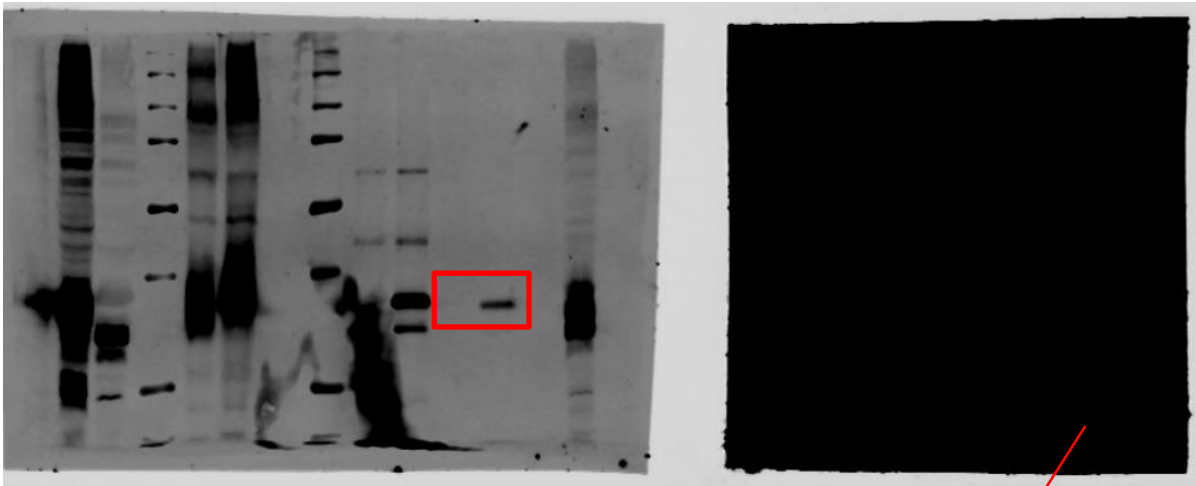

Mito  
IP: Flag  
IB: Flag

These membranes are for unrelated experiments and were scanned simultaneously.

pCeg3  
dotA<sup>-</sup> WT

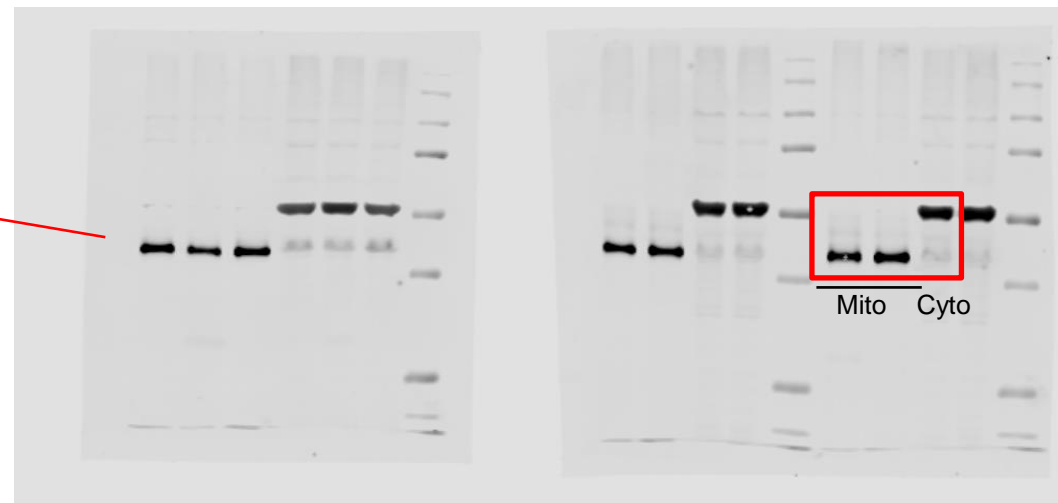

Mito Cyto

pCeg3  
dotA<sup>-</sup> WT

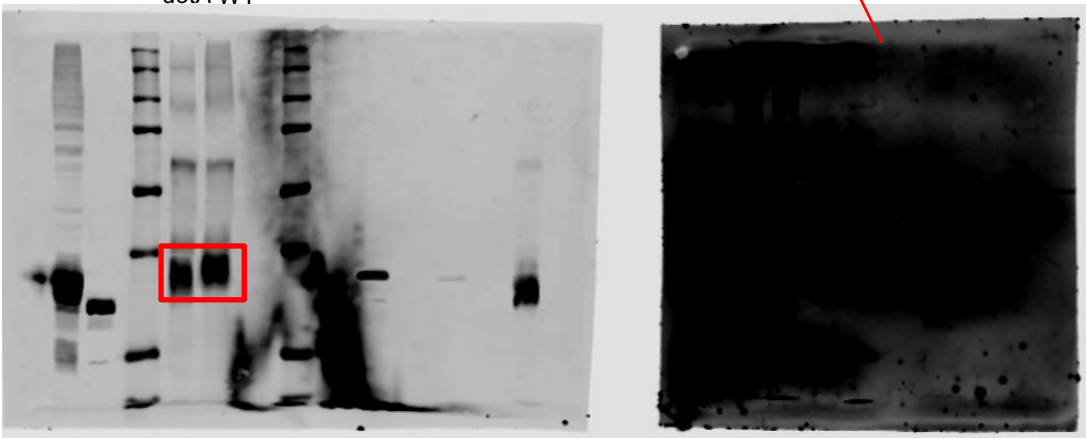

Expression  
IB: Flag

pCeg3  
dotA<sup>-</sup> WT

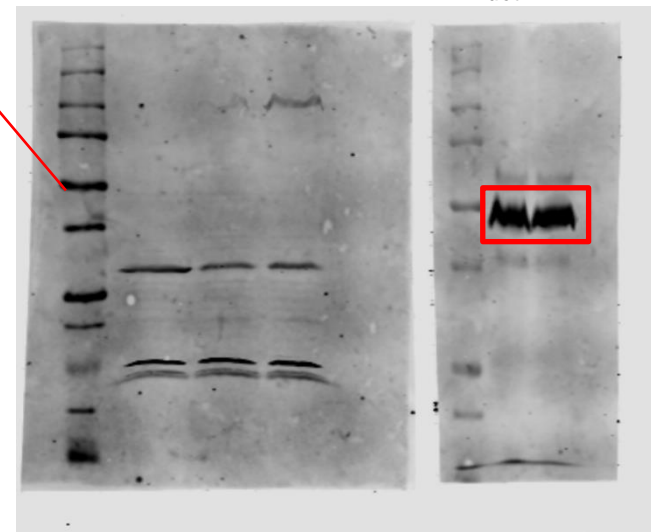

Expression  
IB: ICDH

Figure 1G source data

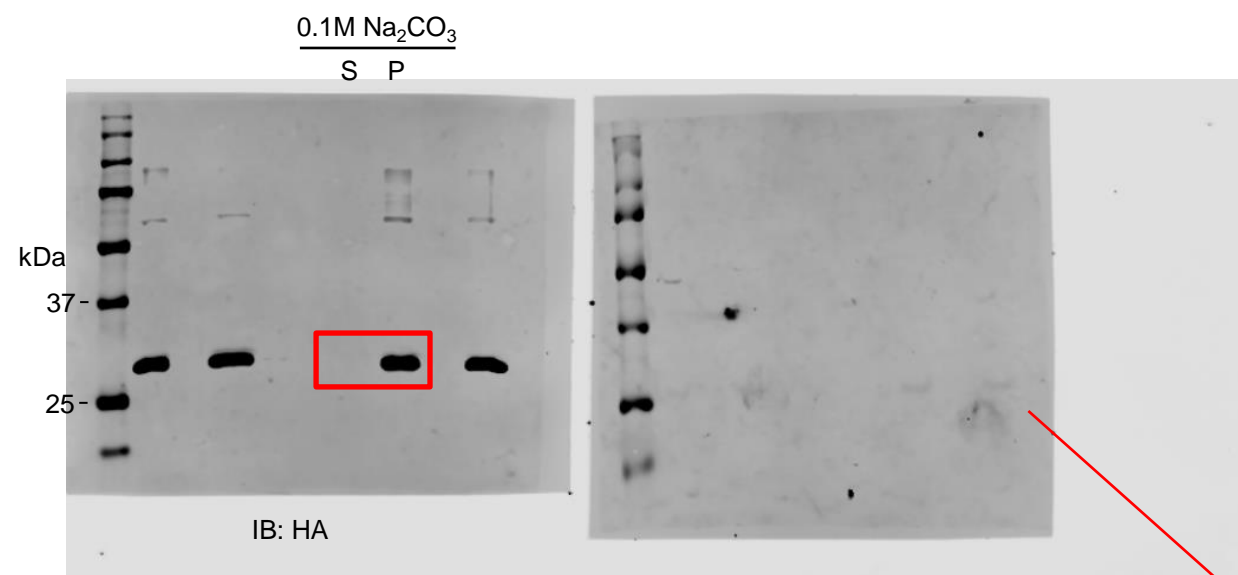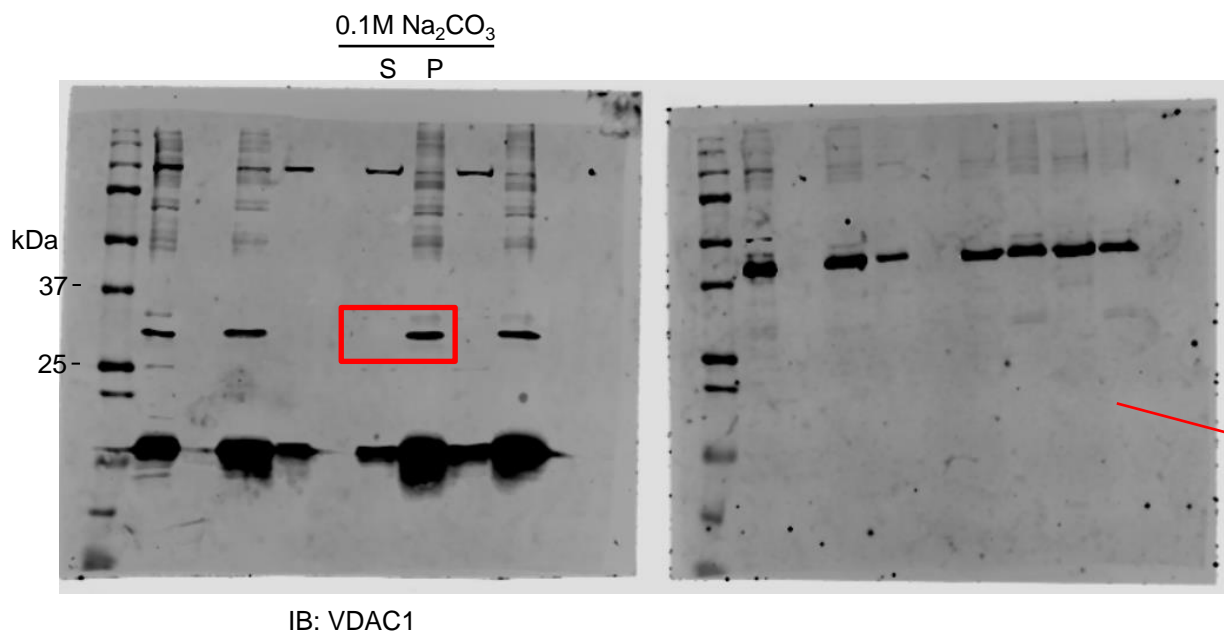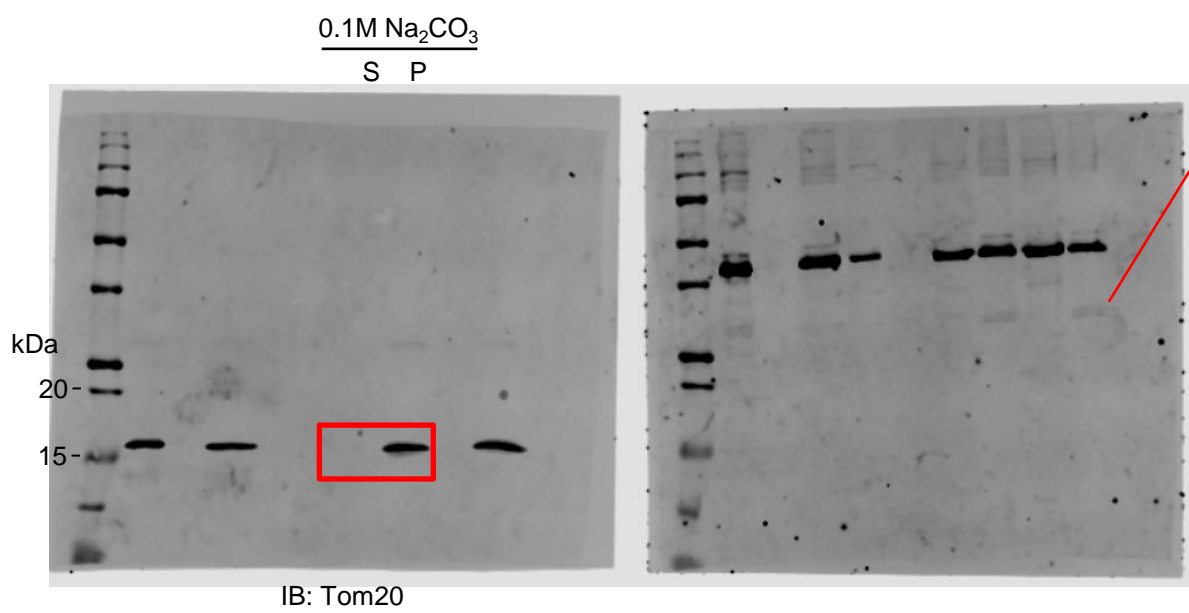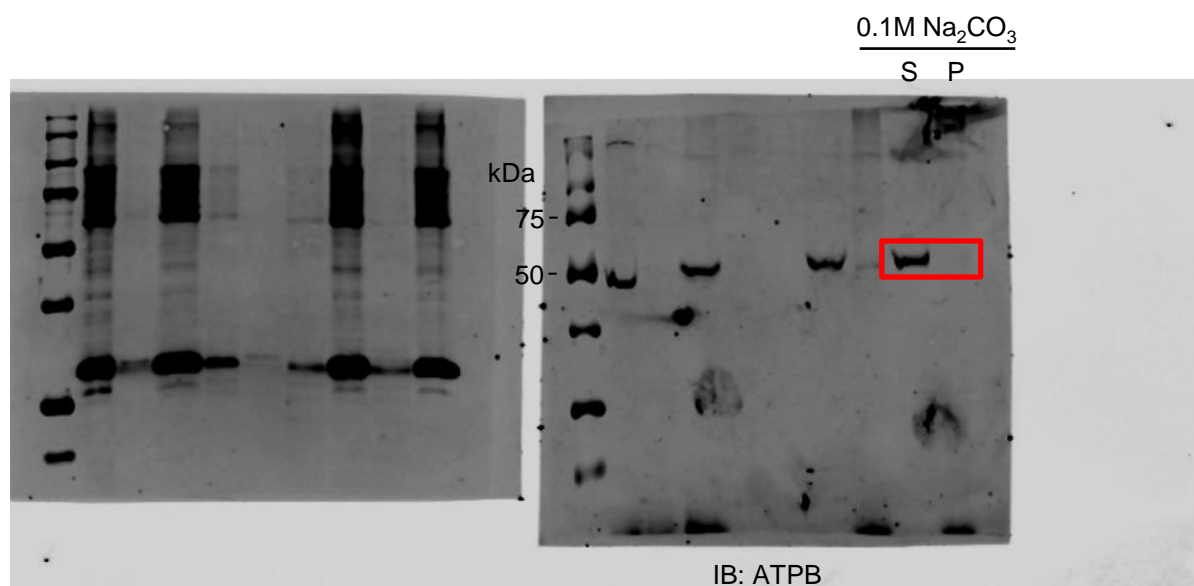

These membranes are for unrelated experiments and were scanned simultaneously.

Figure 1G source data

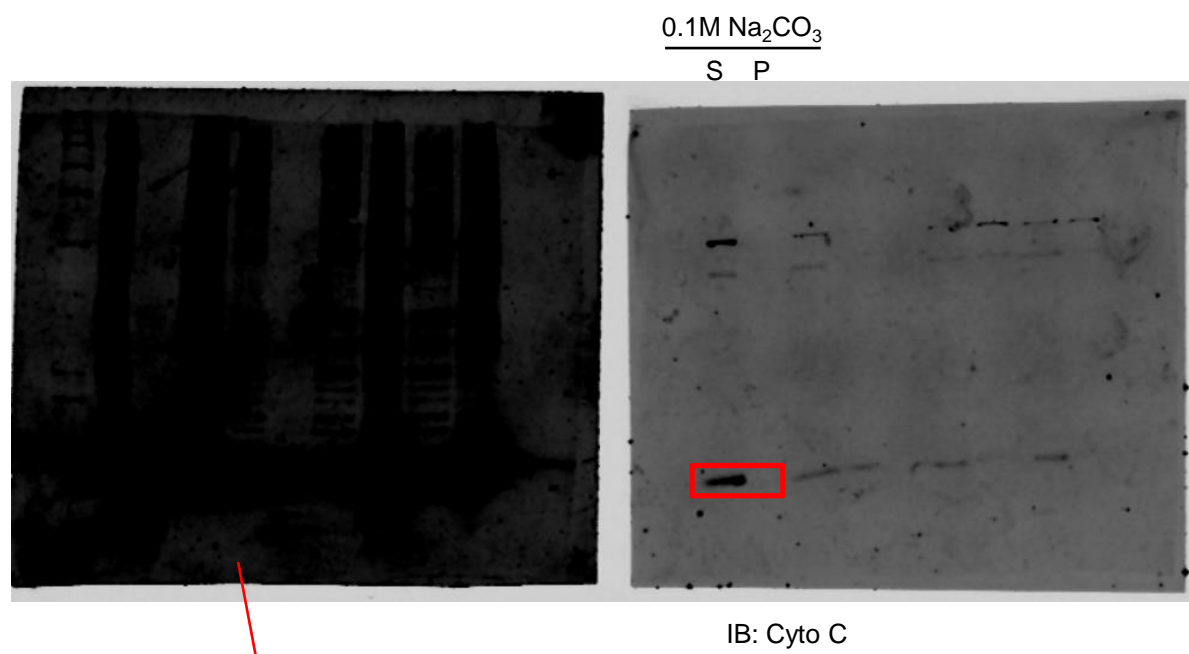

This membrane is for an unrelated experiment and was scanned simultaneously.

Figure 2A source data

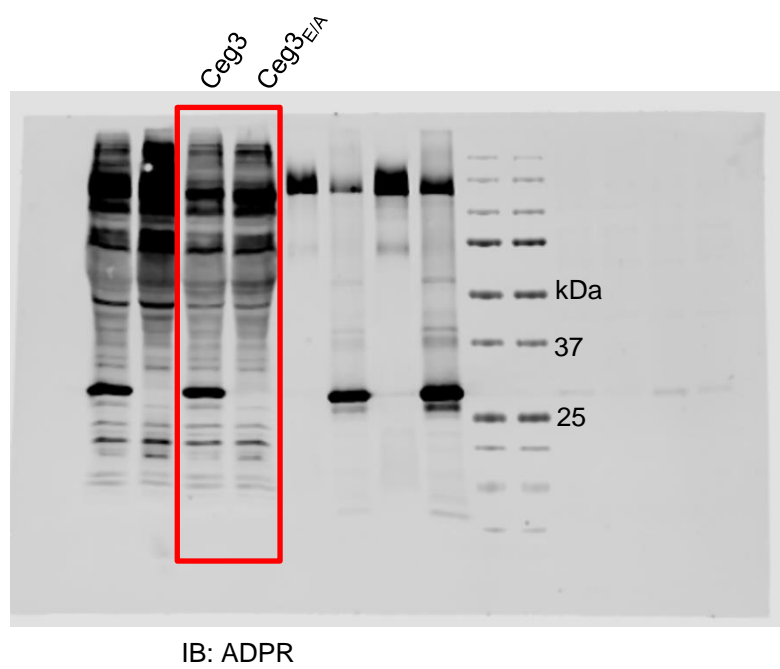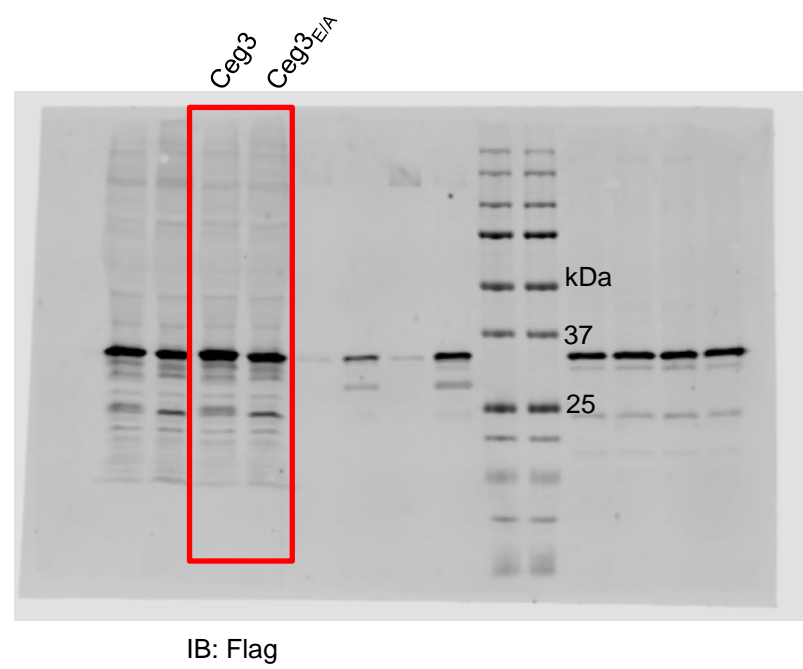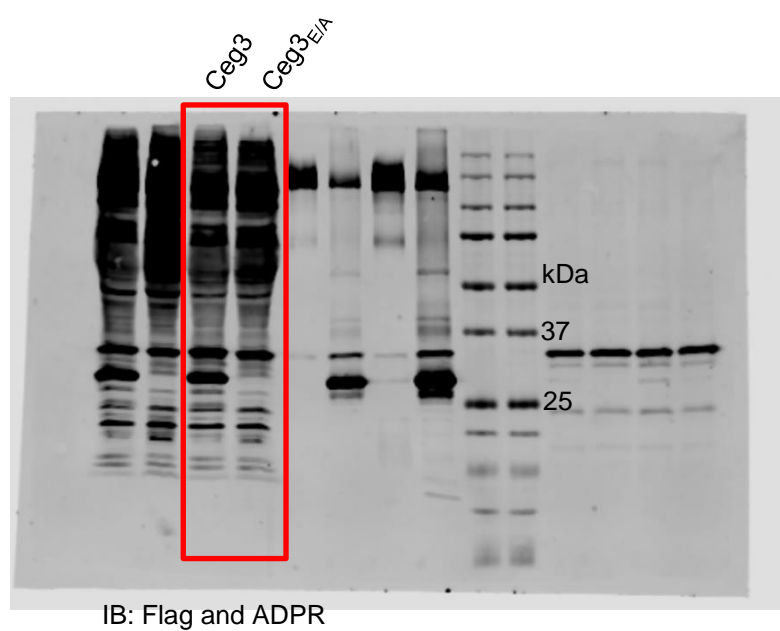

Figure 2B source data

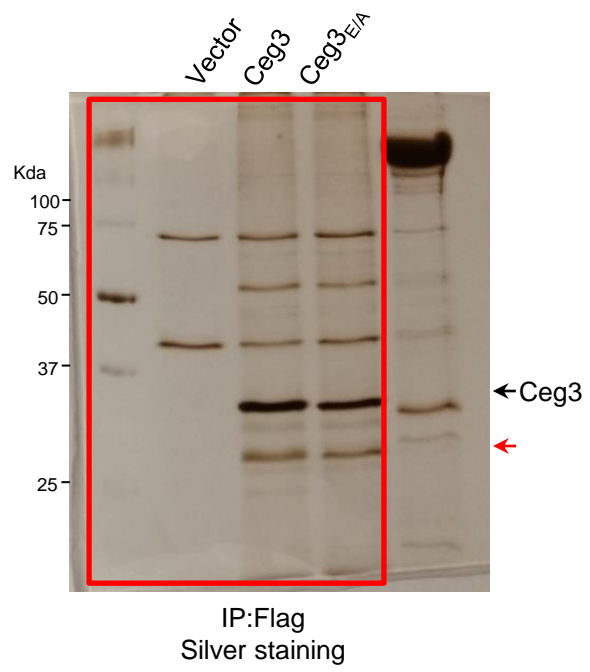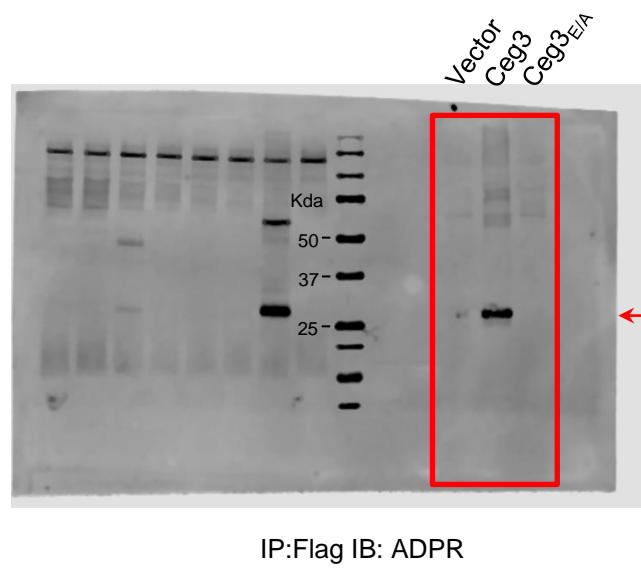

Figure 2C source data

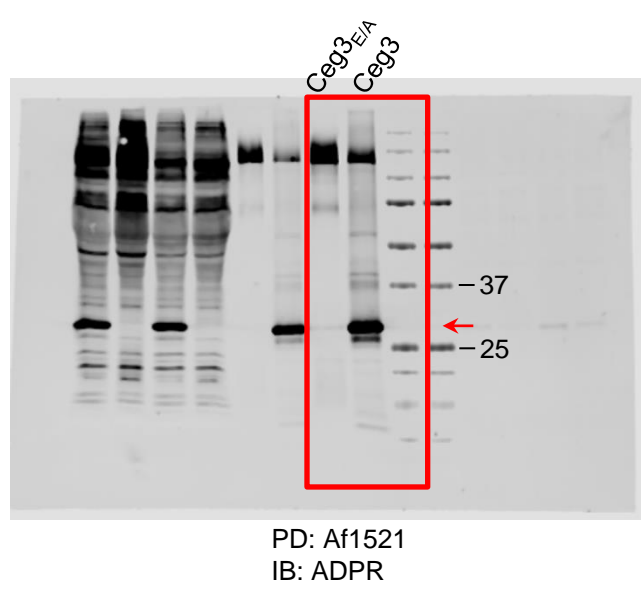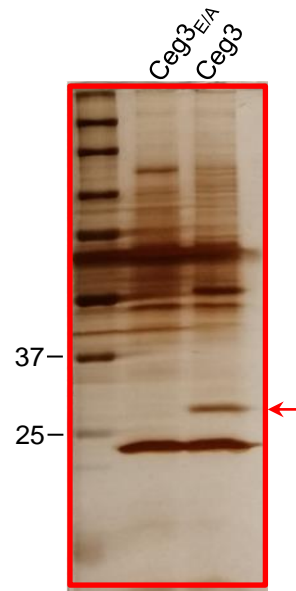

Figure 2D source data

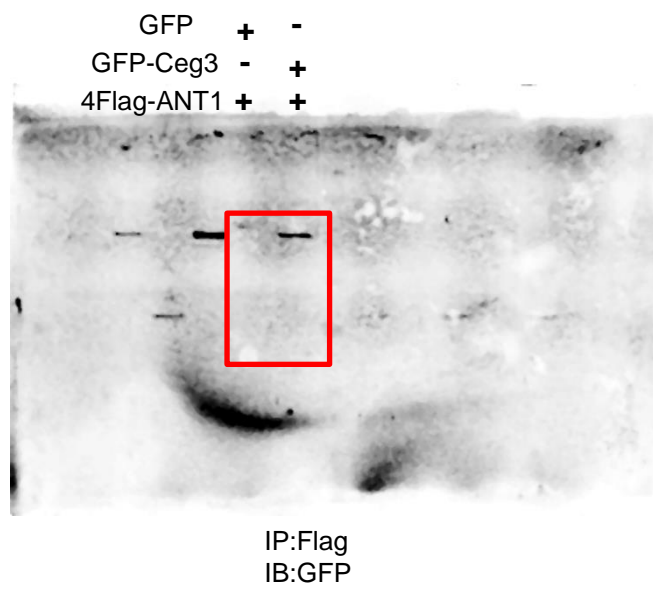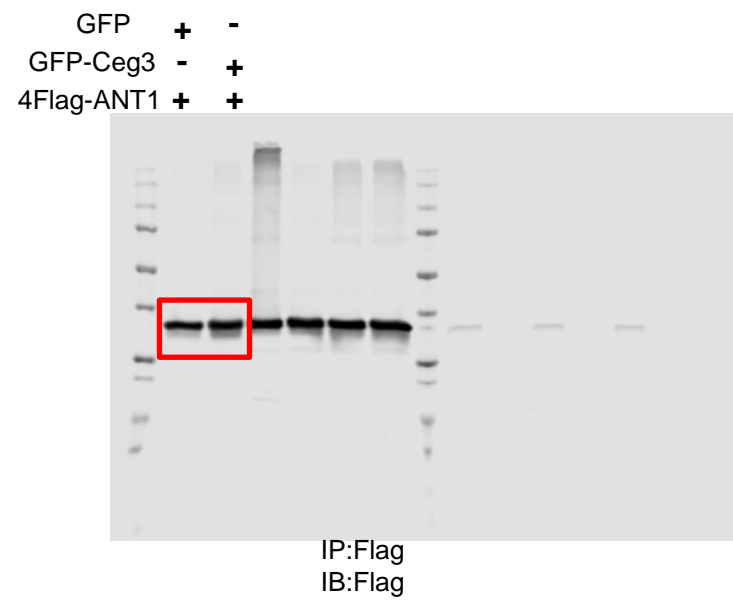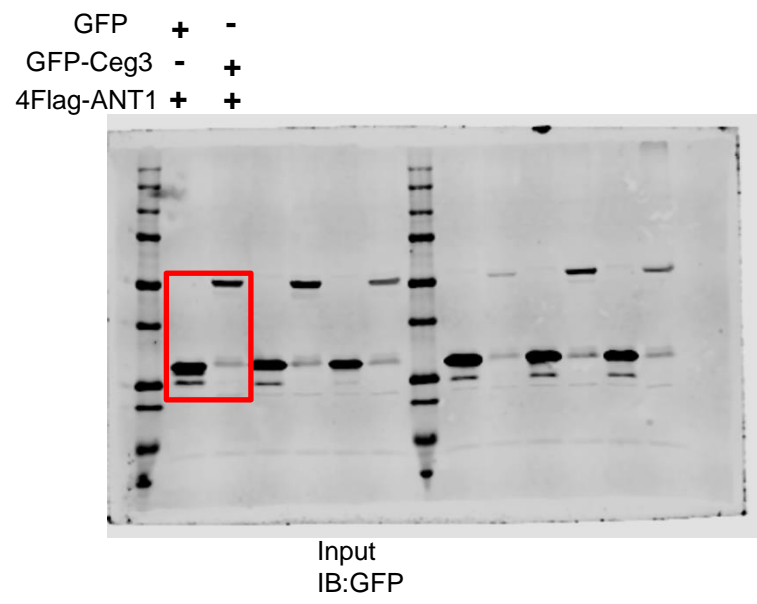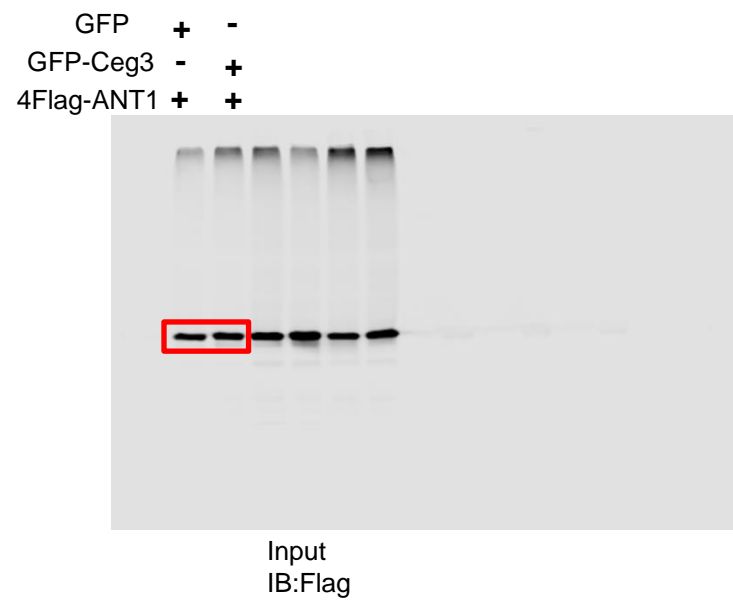



Figure 3A source data

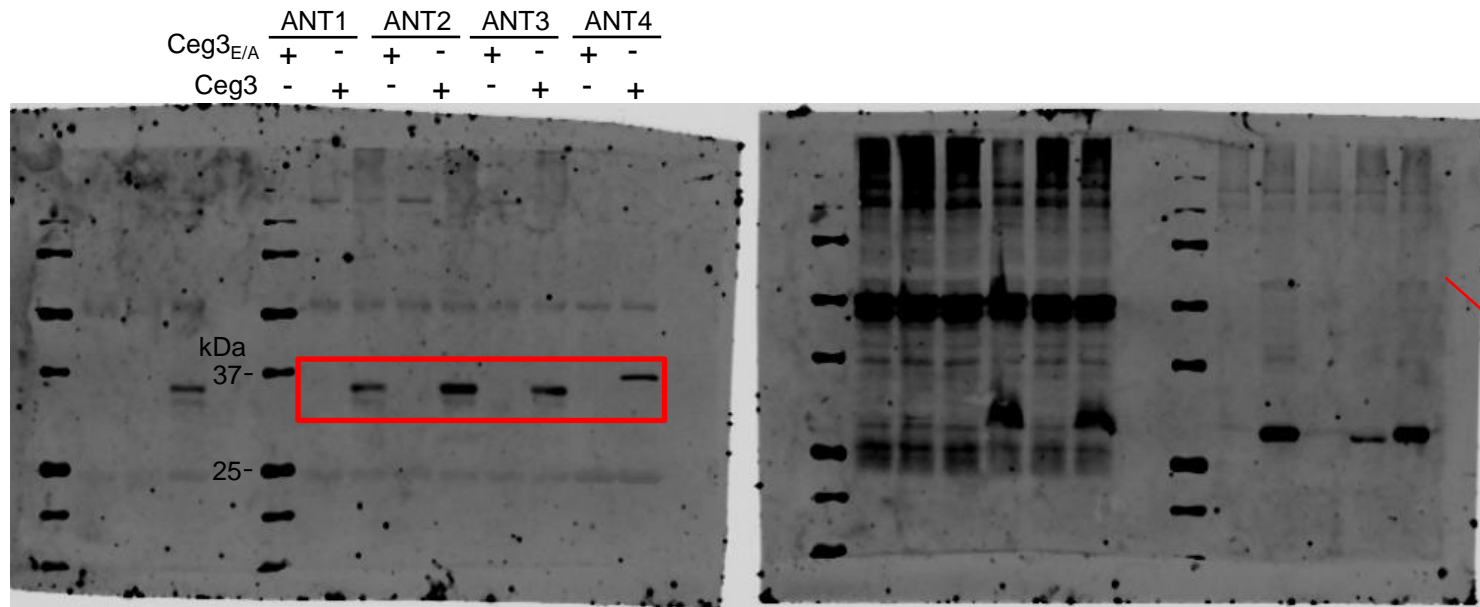

IB:Flag IB: ADPR

This membrane is for an unrelated experiment and was scanned simultaneously.

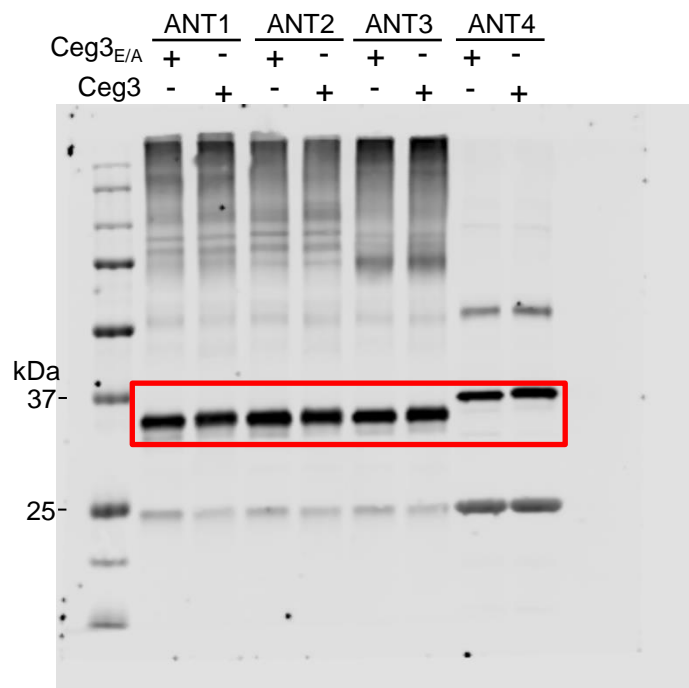

IB:Flag IB: Flag

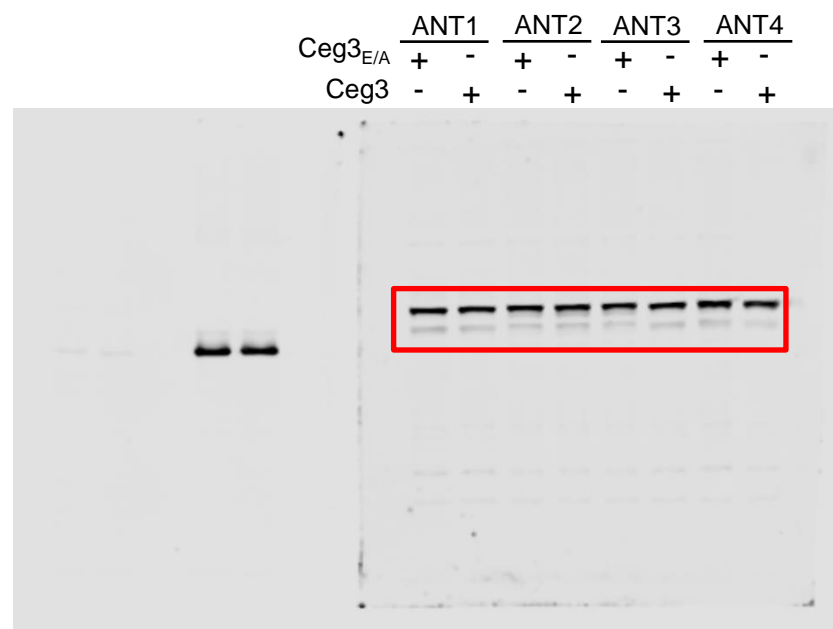

Input IB: GFP

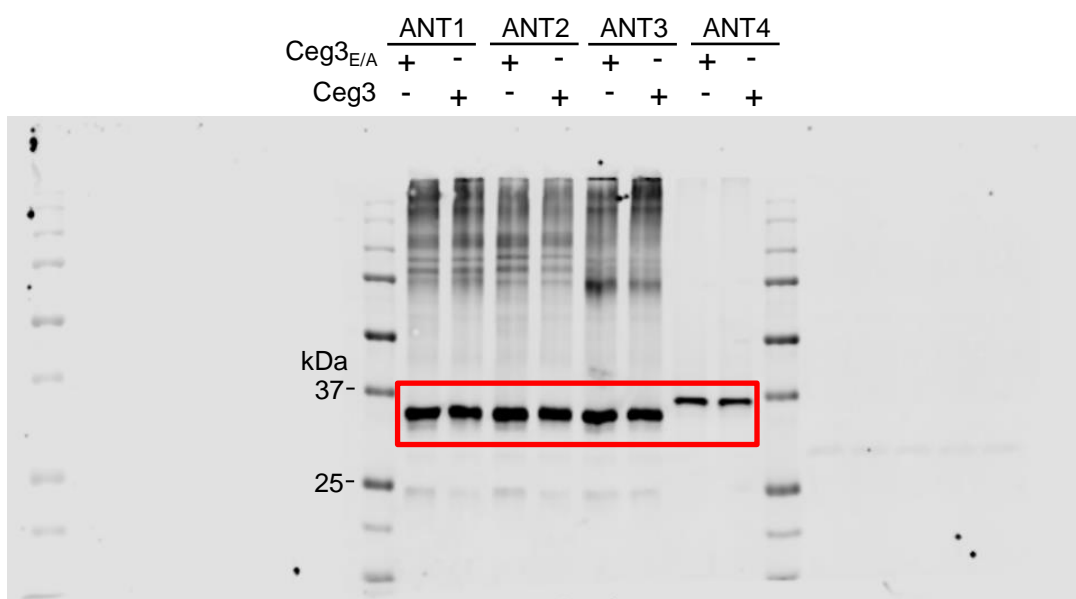

Input IB: Flag

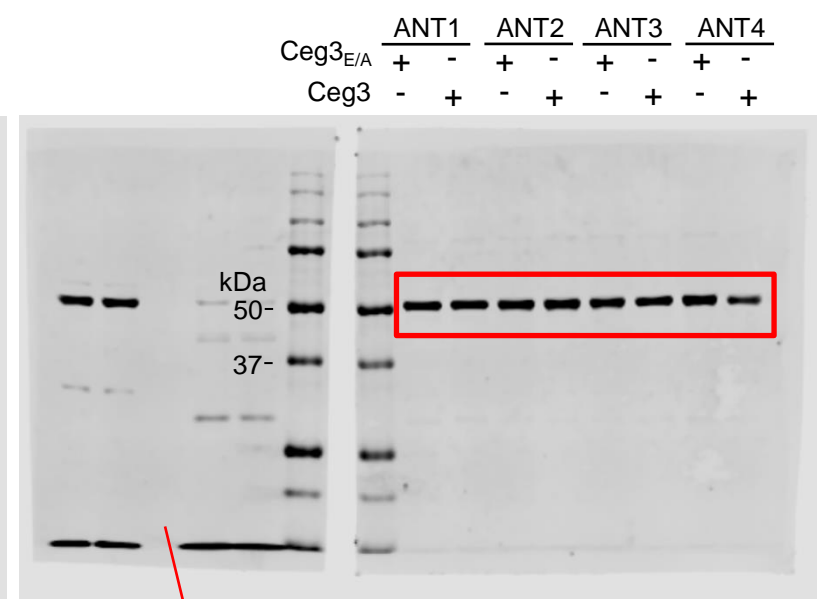

Input IB: Tubulin

This membrane is for an unrelated experiment and was scanned simultaneously.

Figure 3D source data

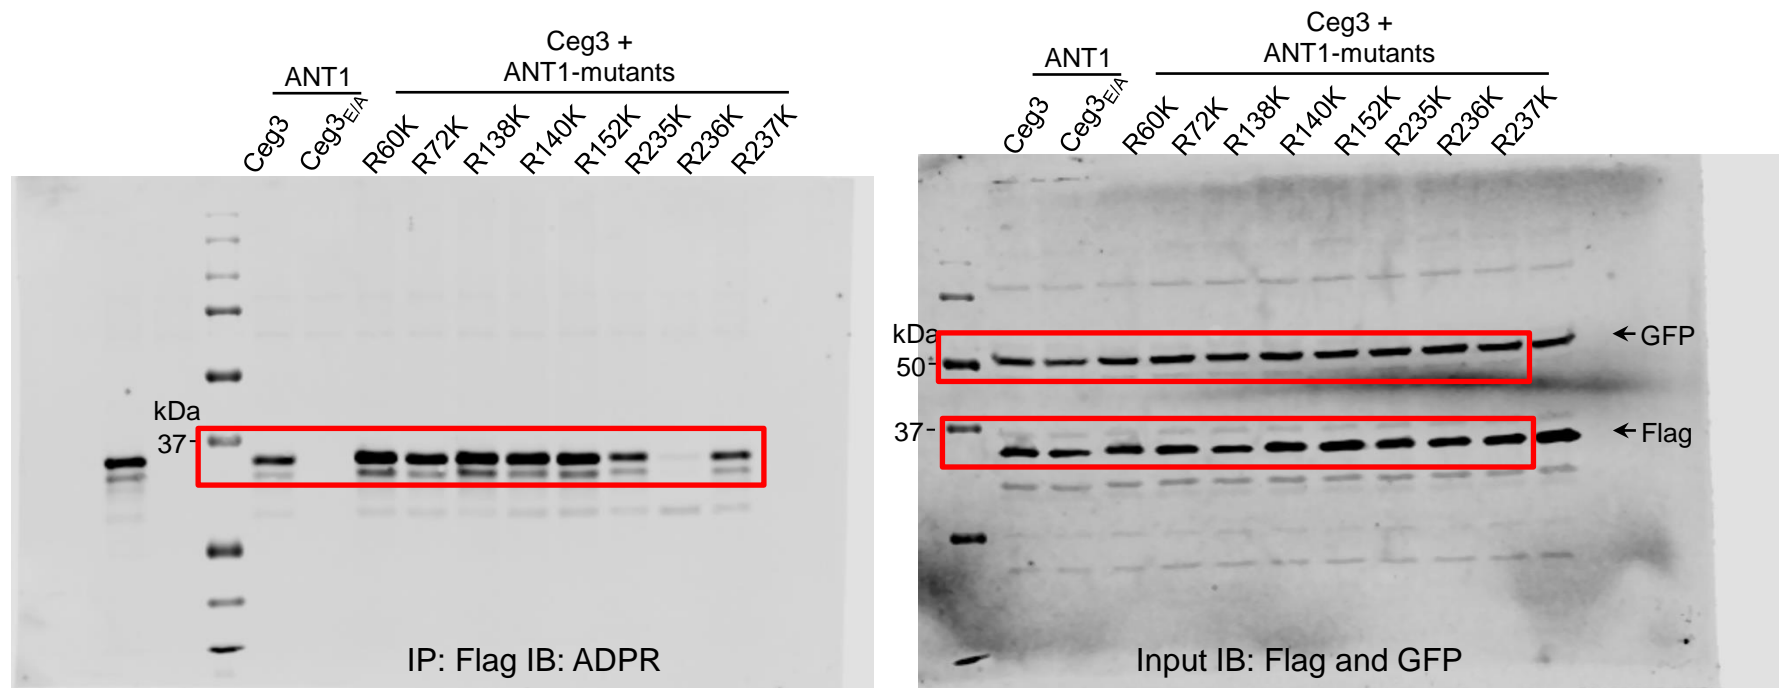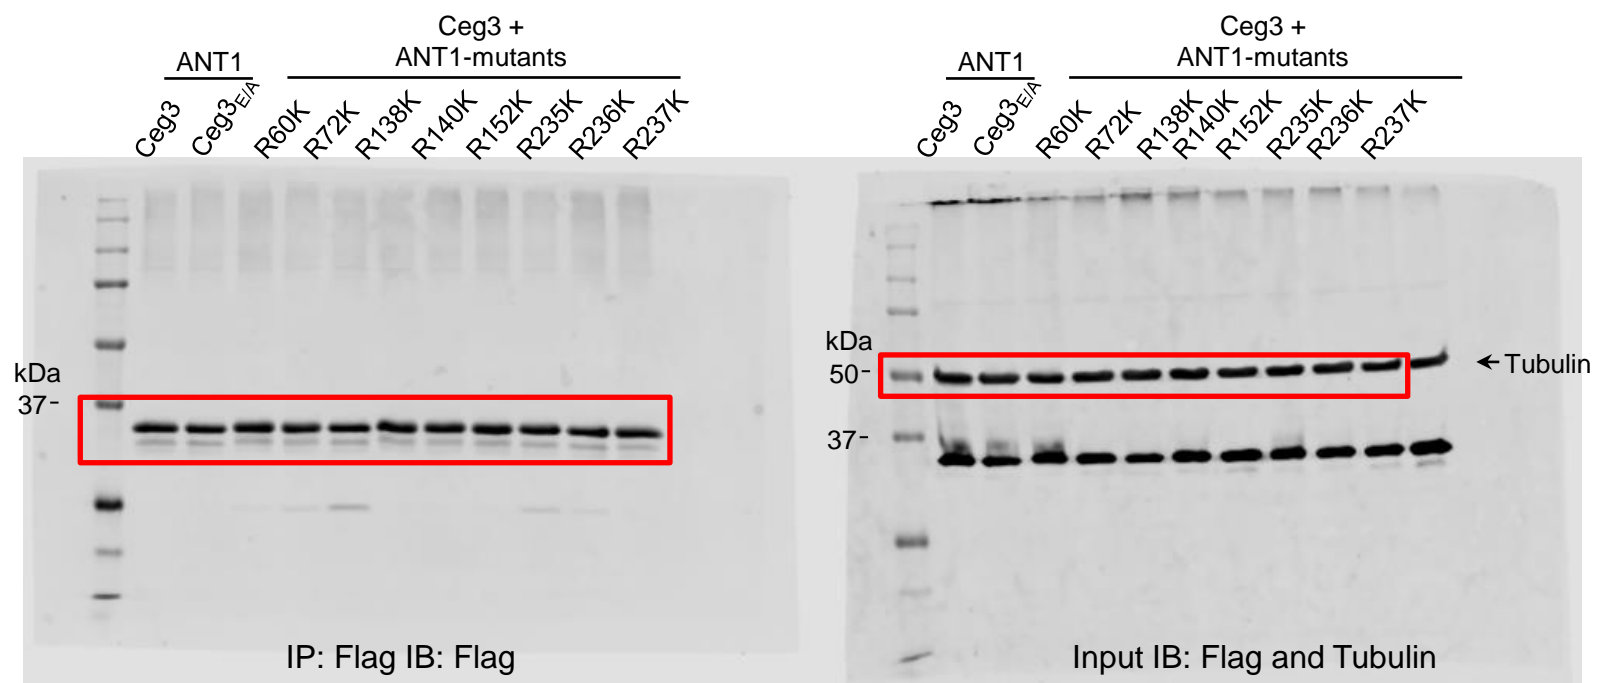

Figure 3E source data

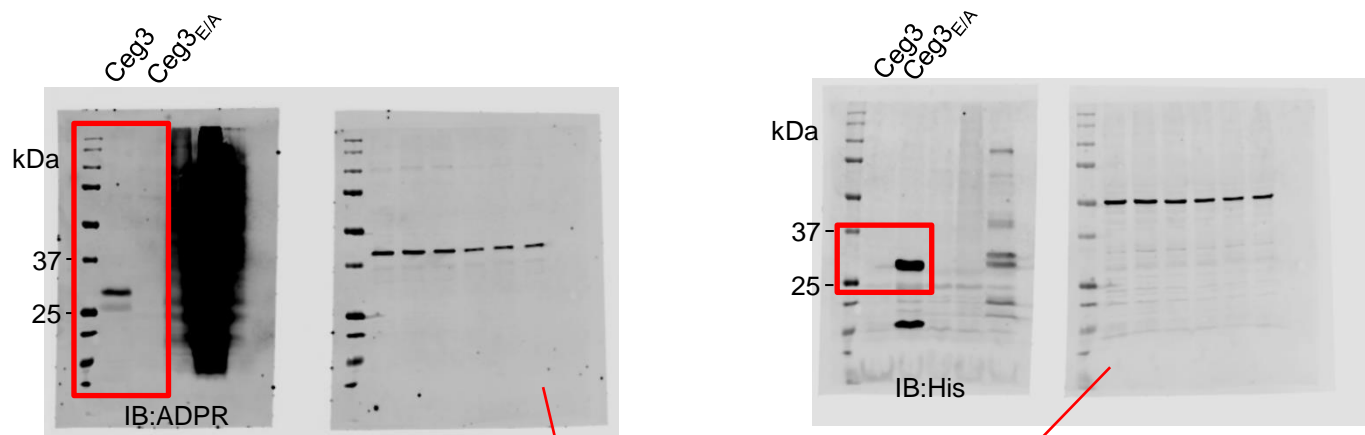

These membranes are for unrelated experiments and were scanned simultaneously.



Figure 4A source data

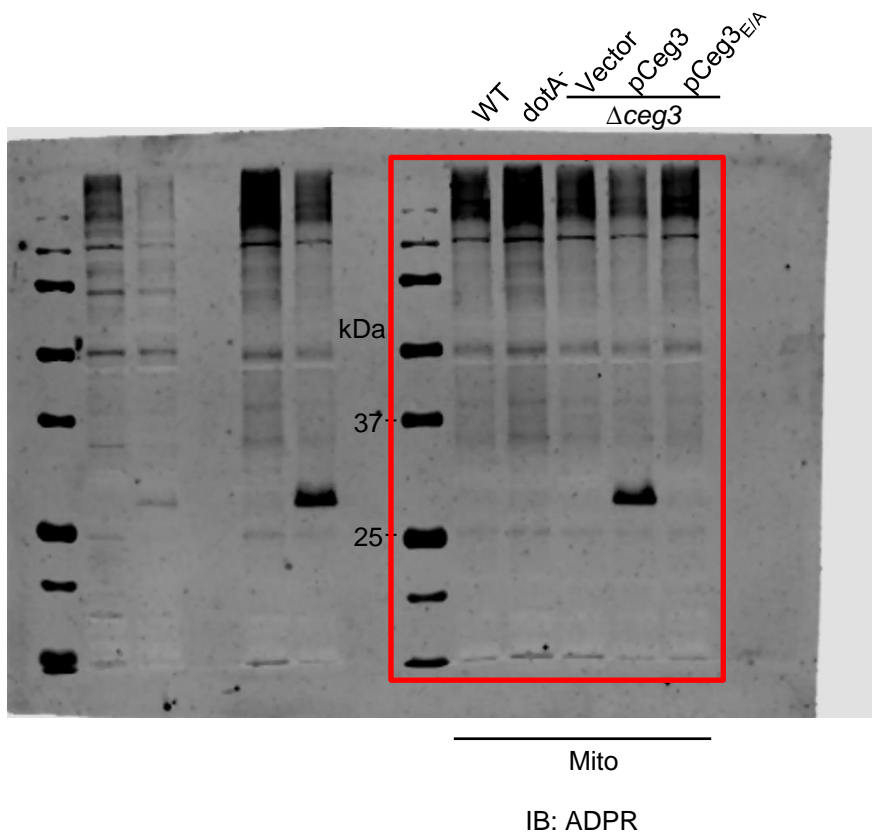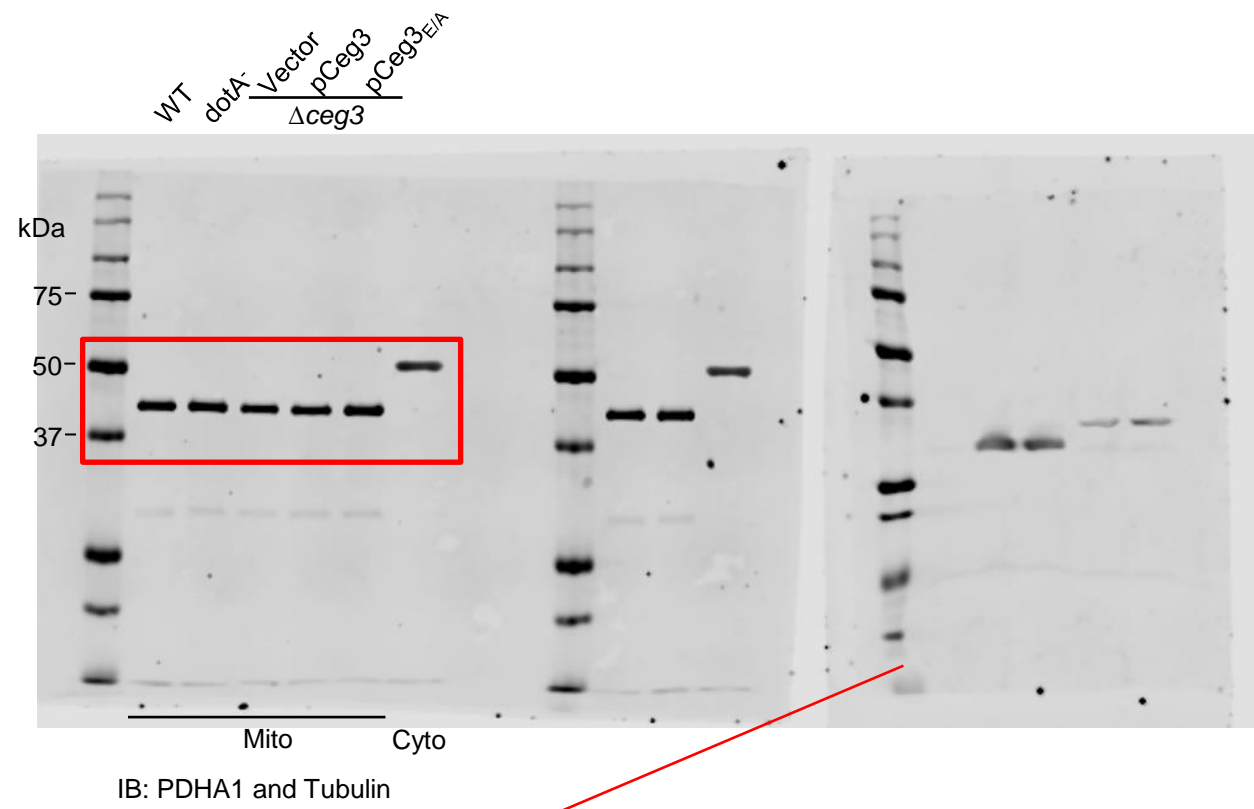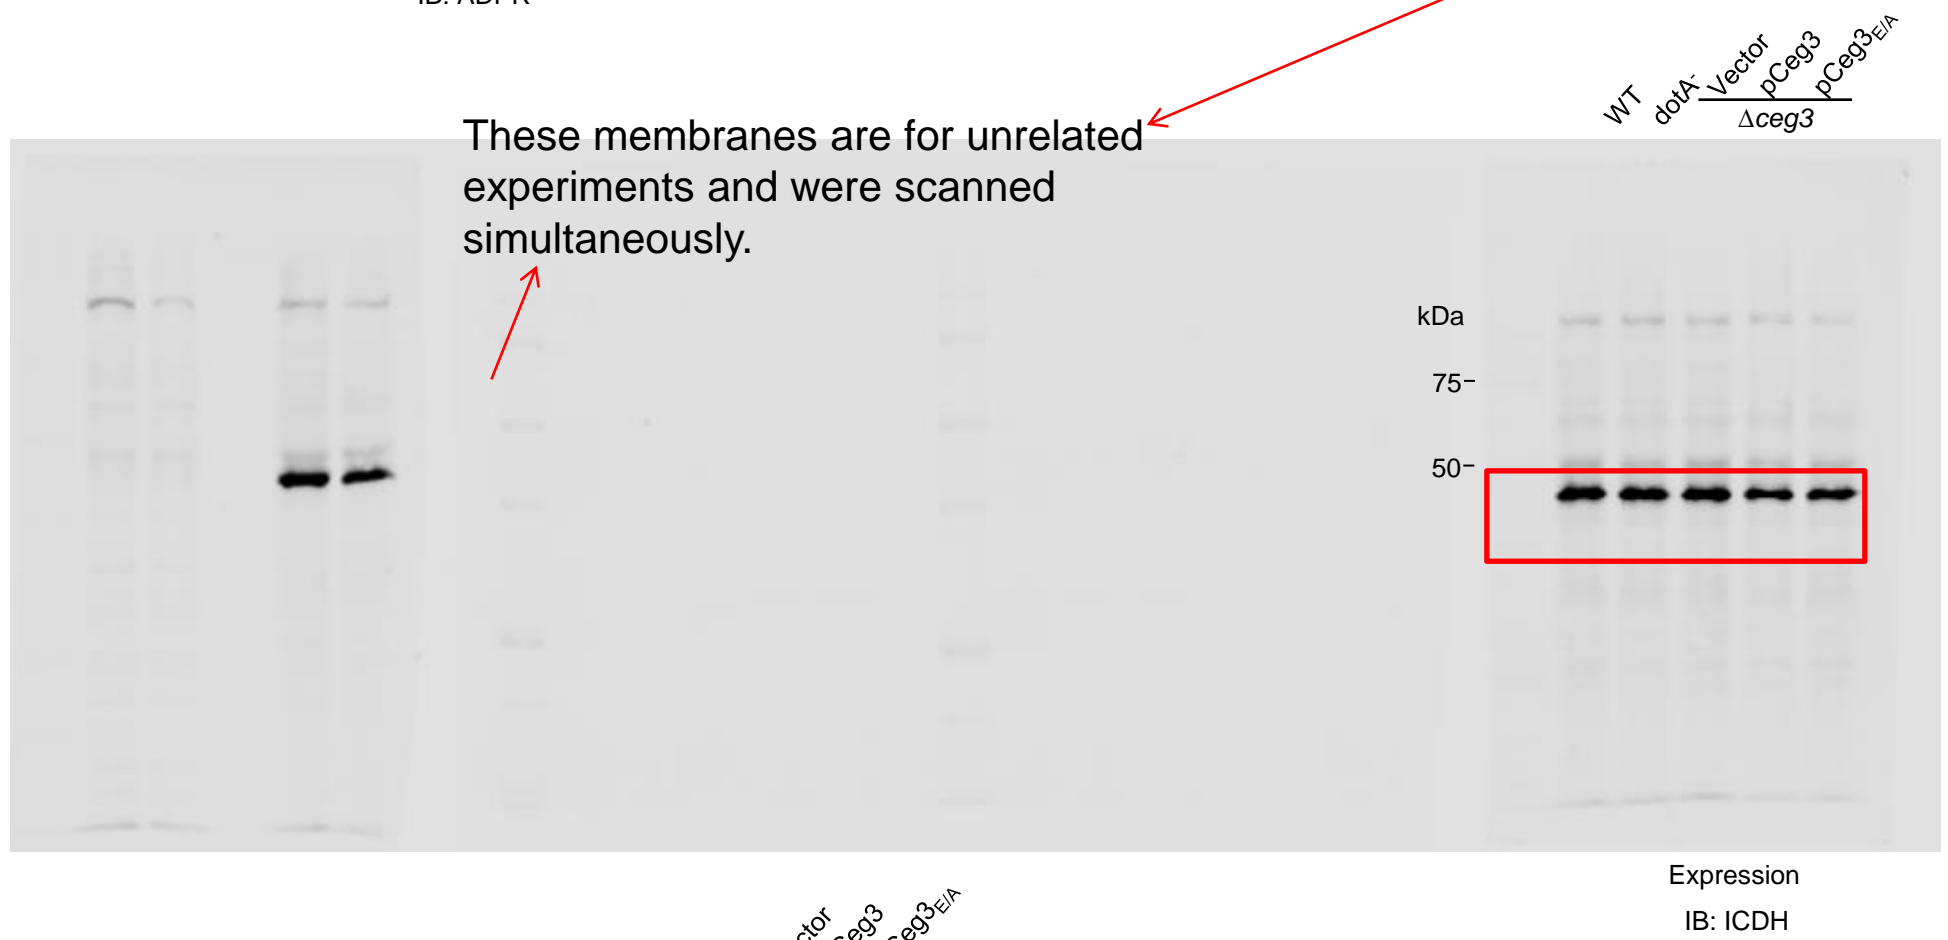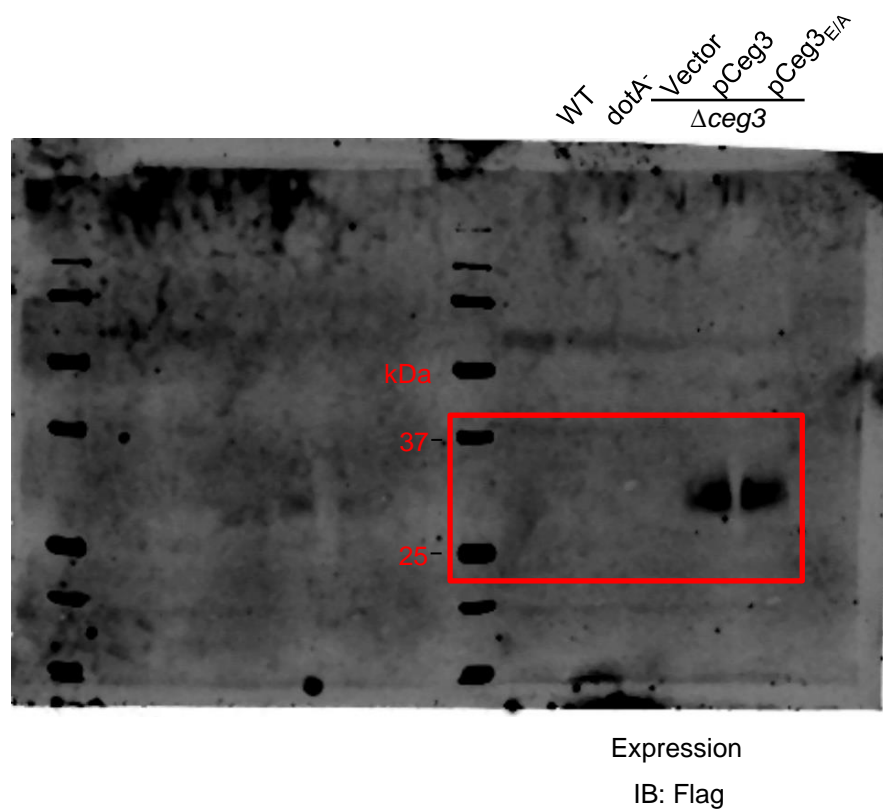

Figure 4B source data

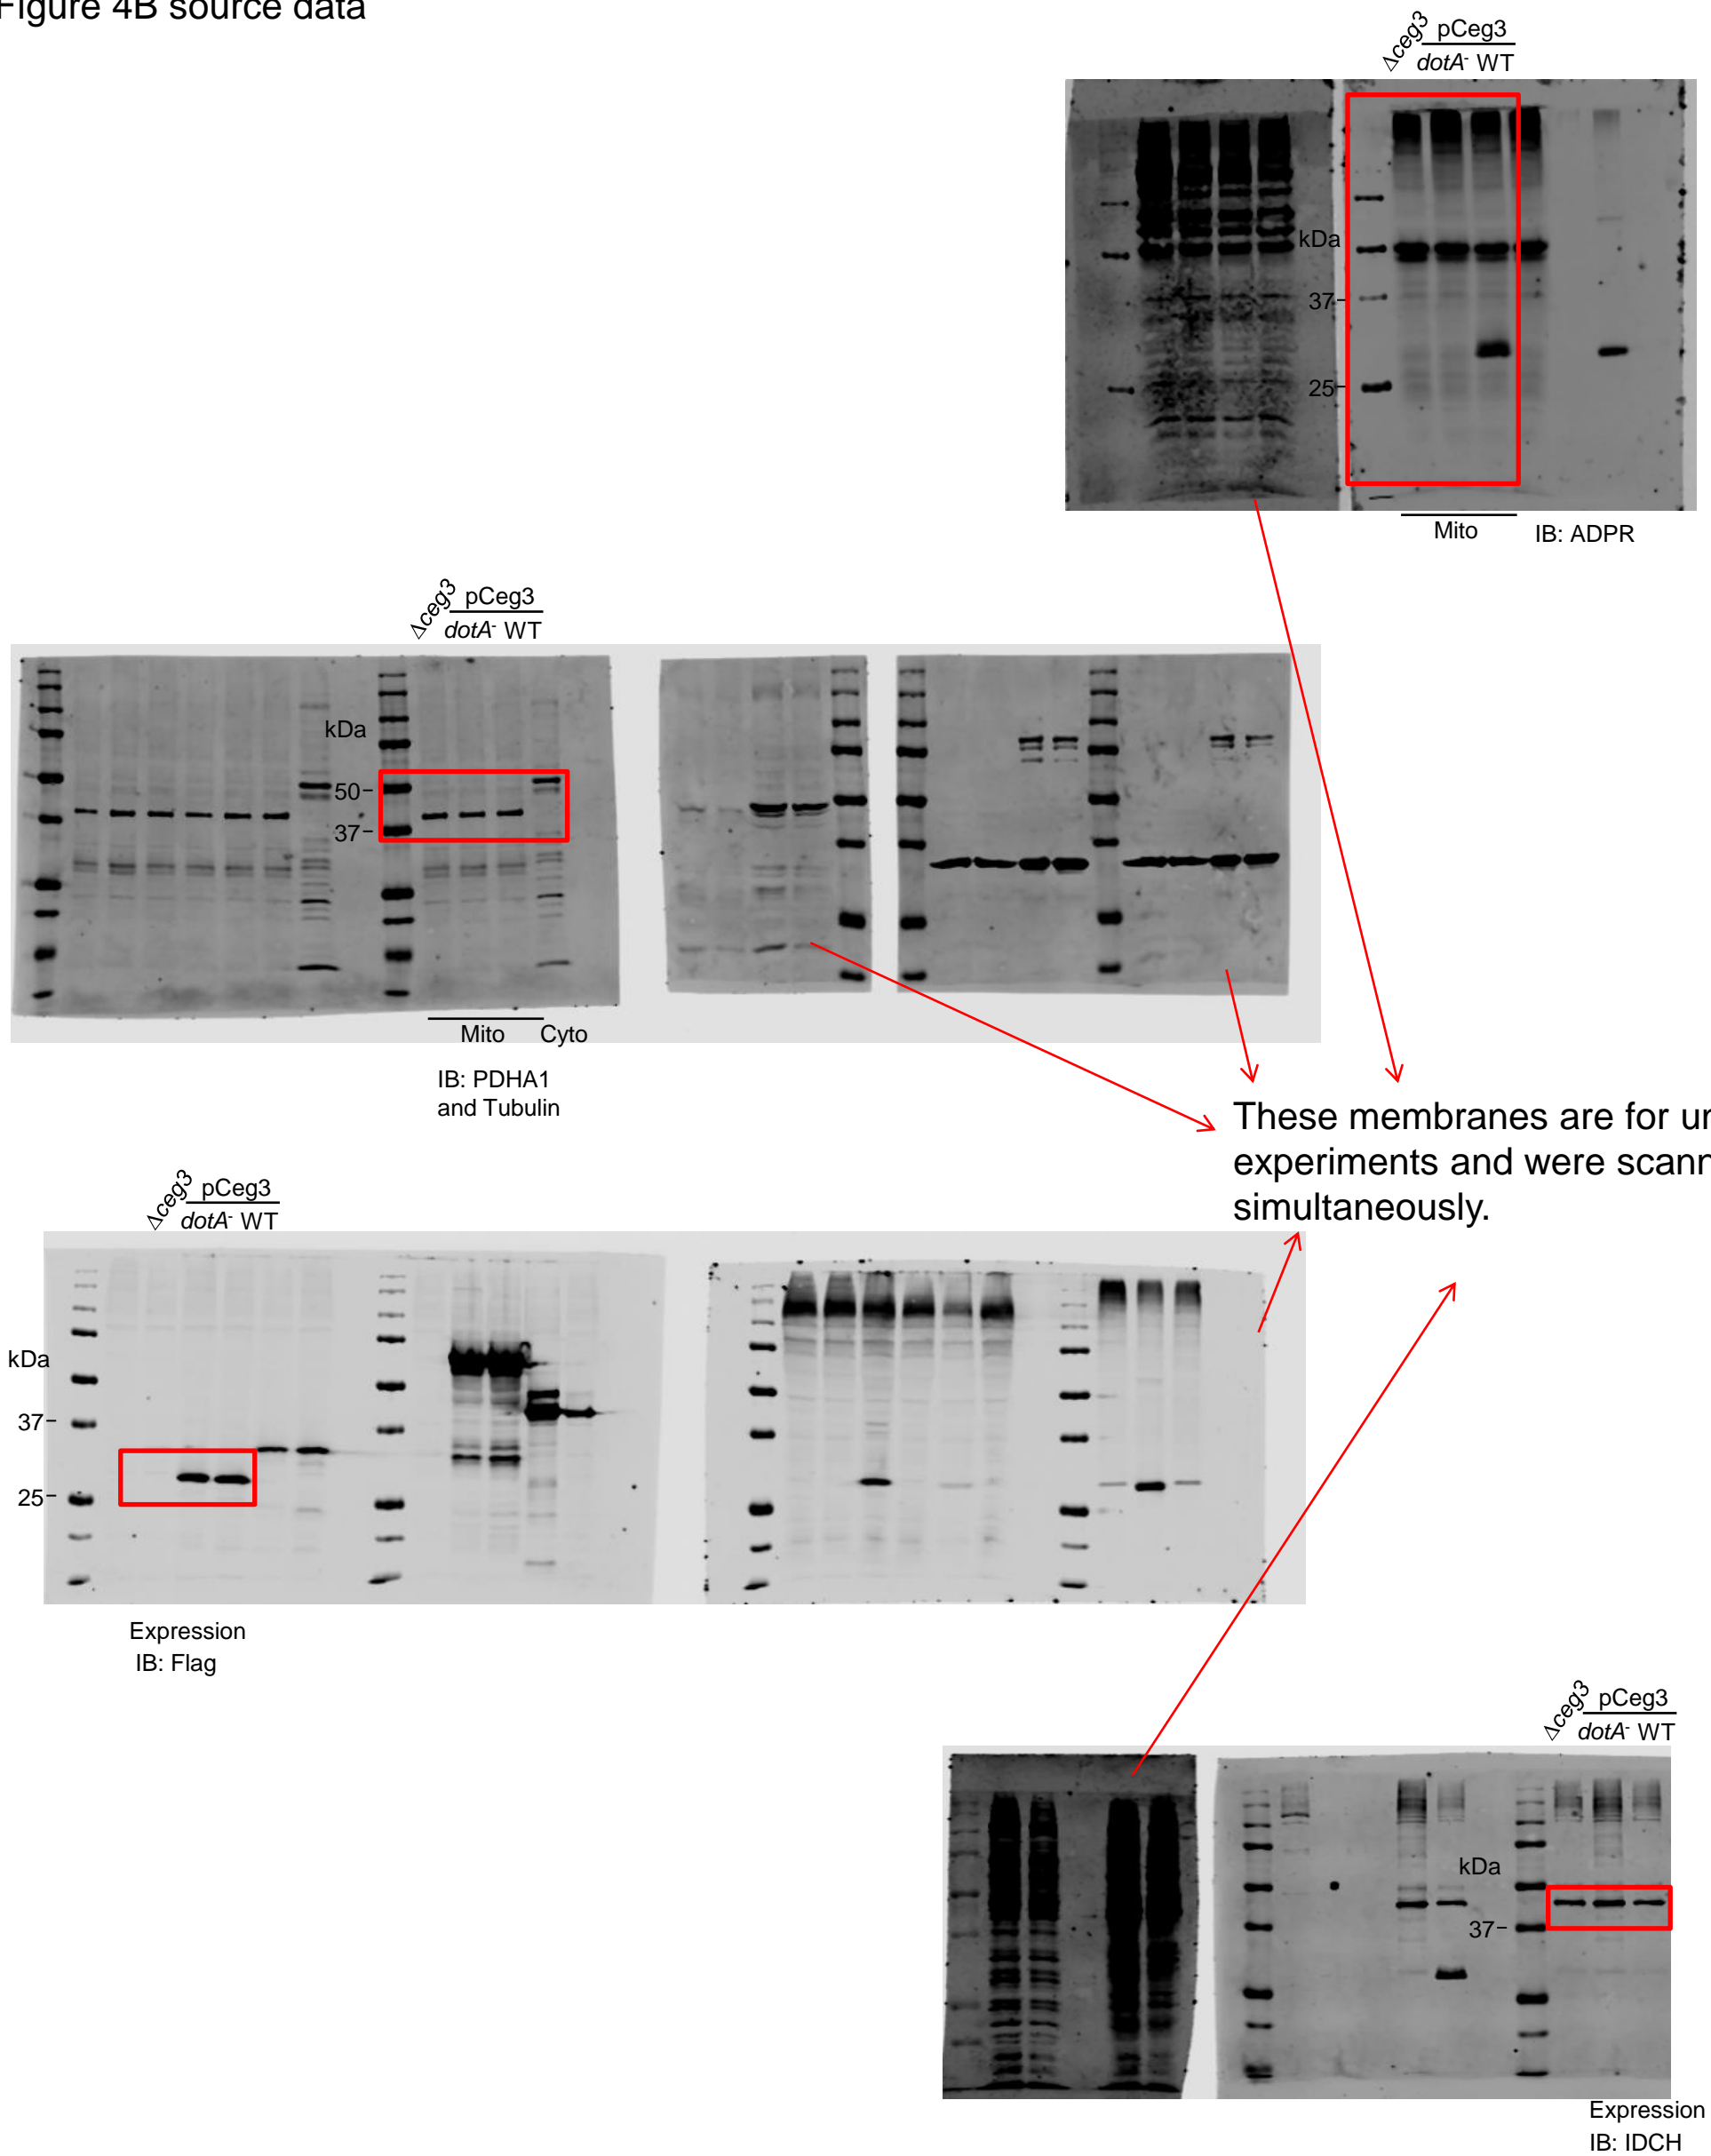

Figure 4C source data

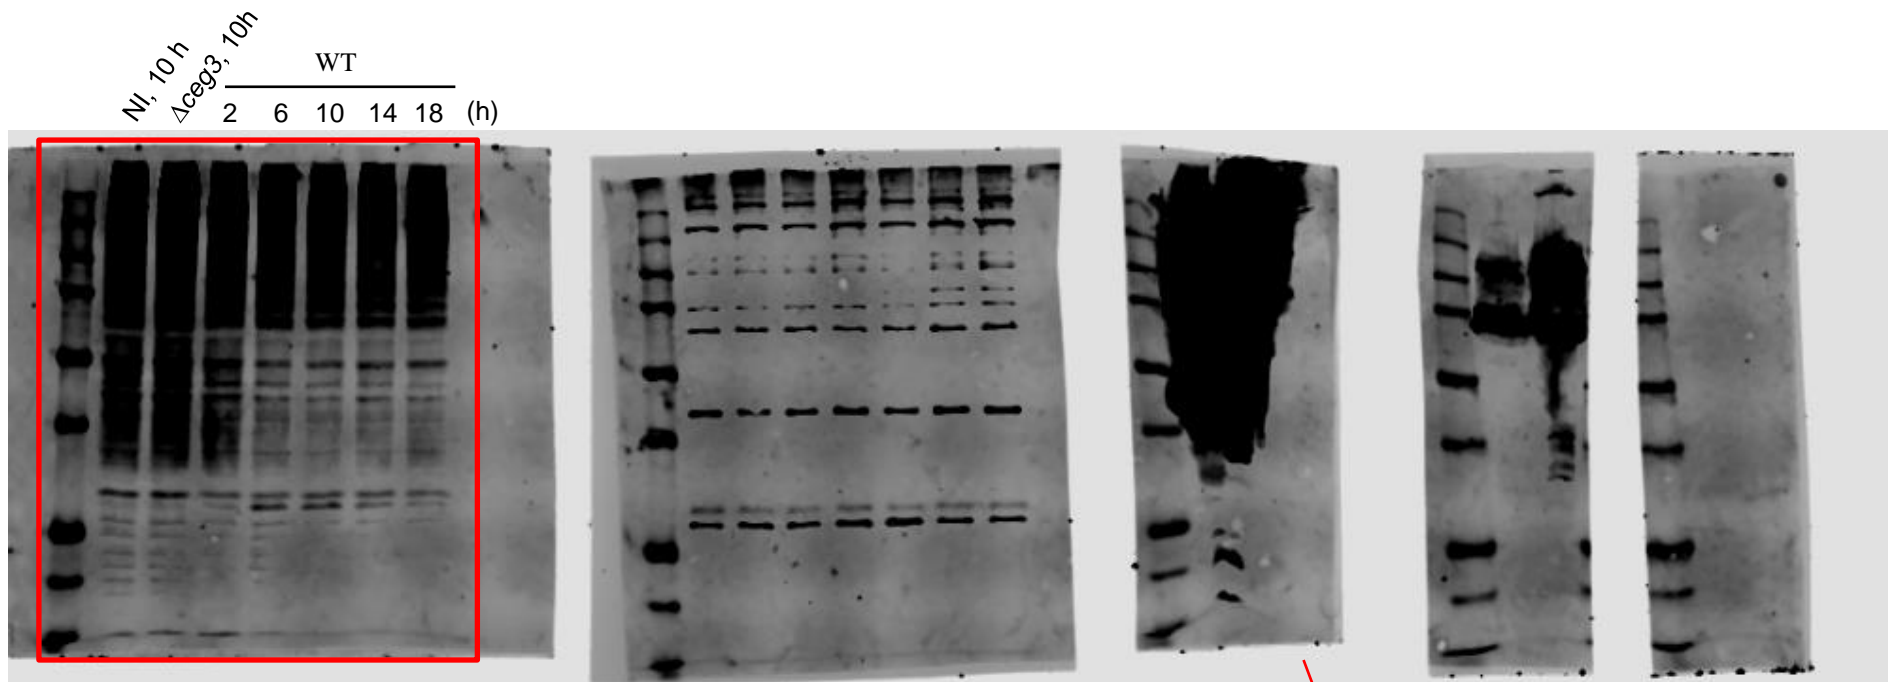

These membranes are for unrelated experiments and were scanned simultaneously.

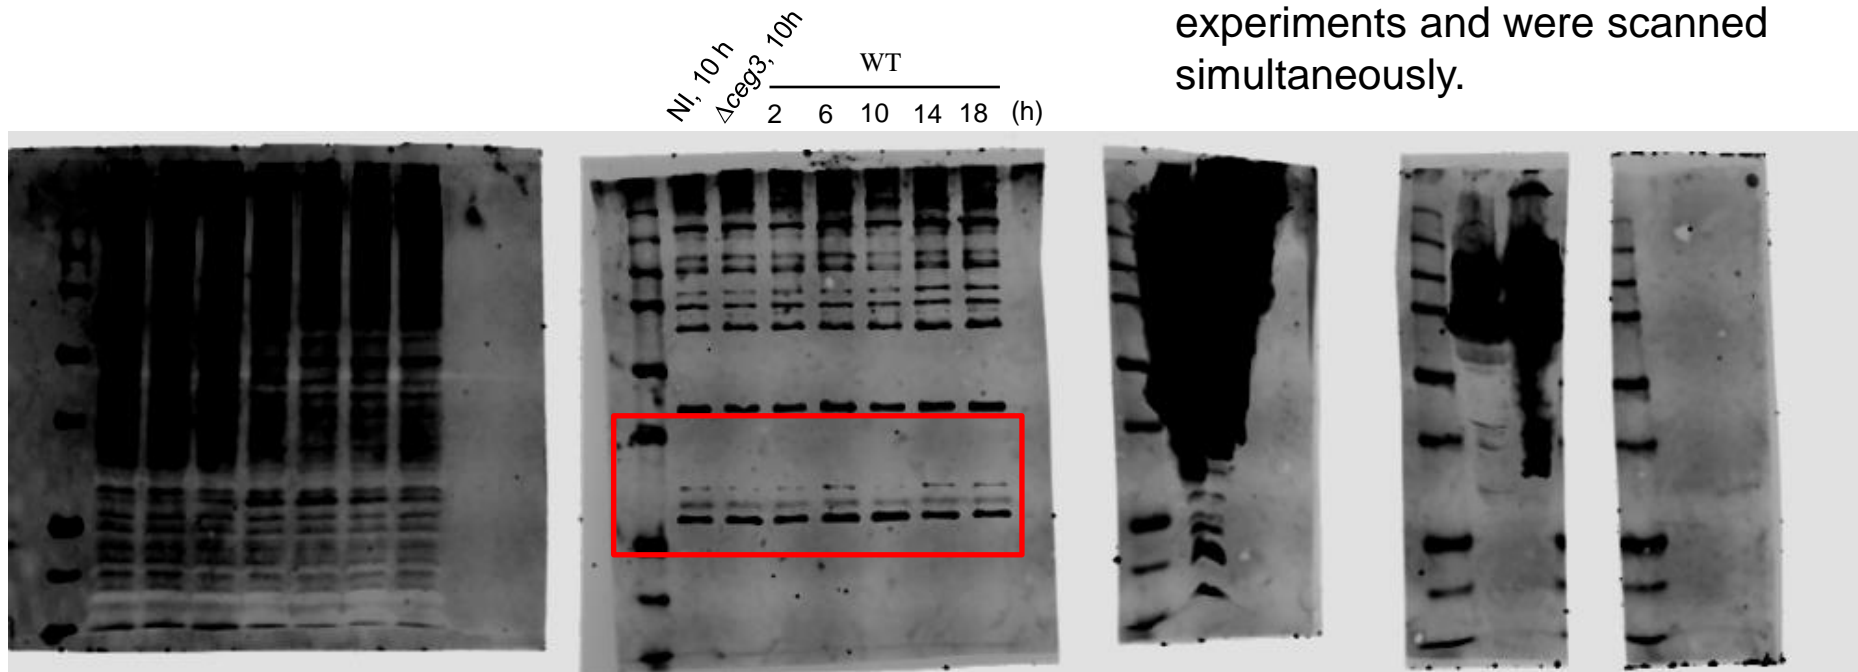

This membrane is for an unrelated experiment and was scanned simultaneously.

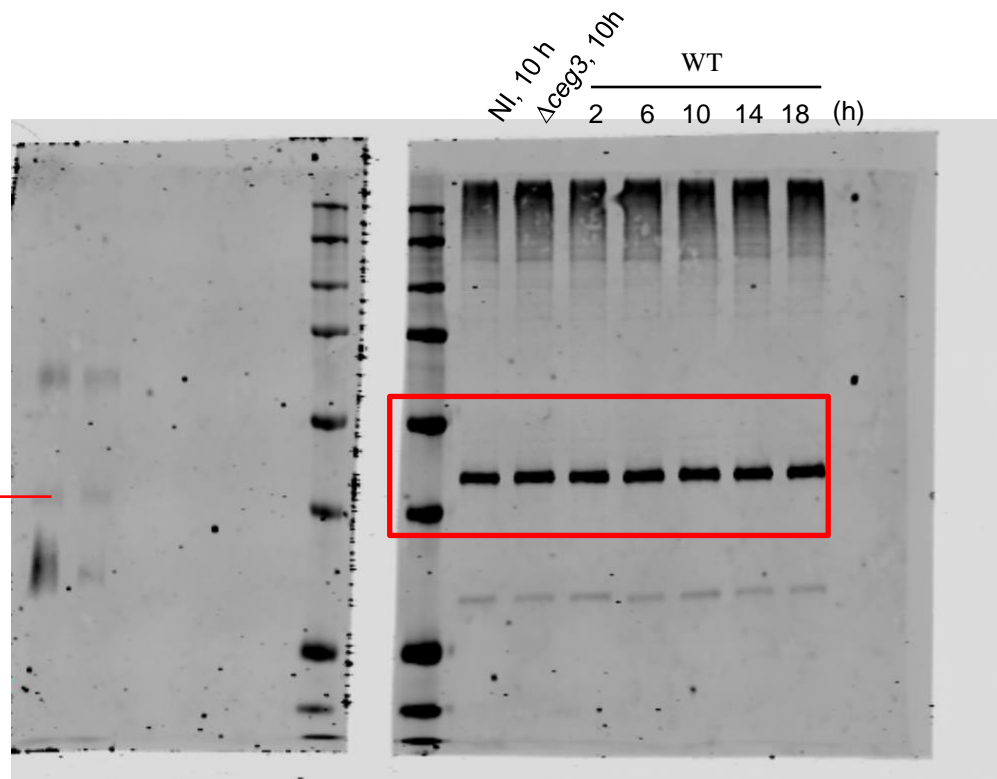

Figure 3-figure supplement 1 source data

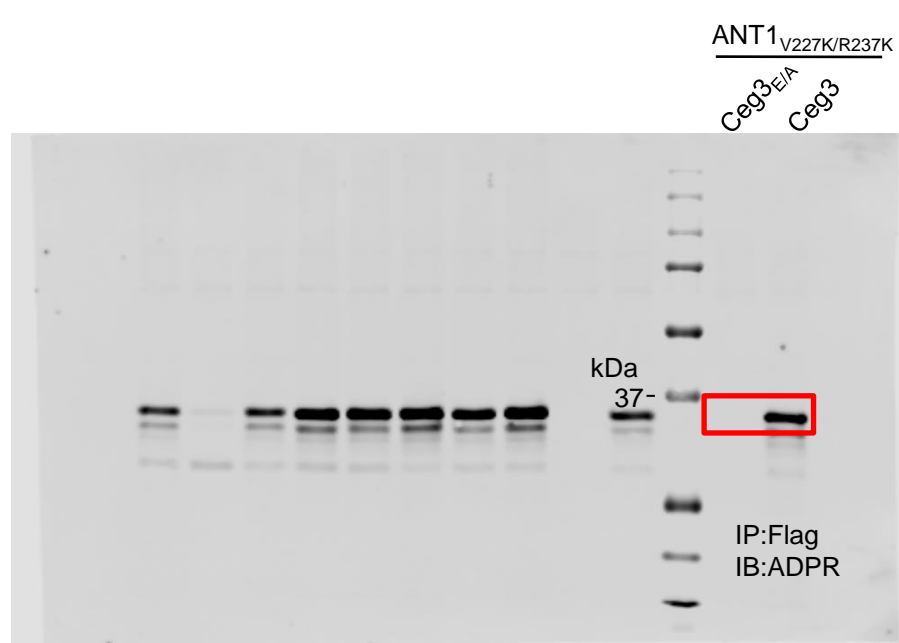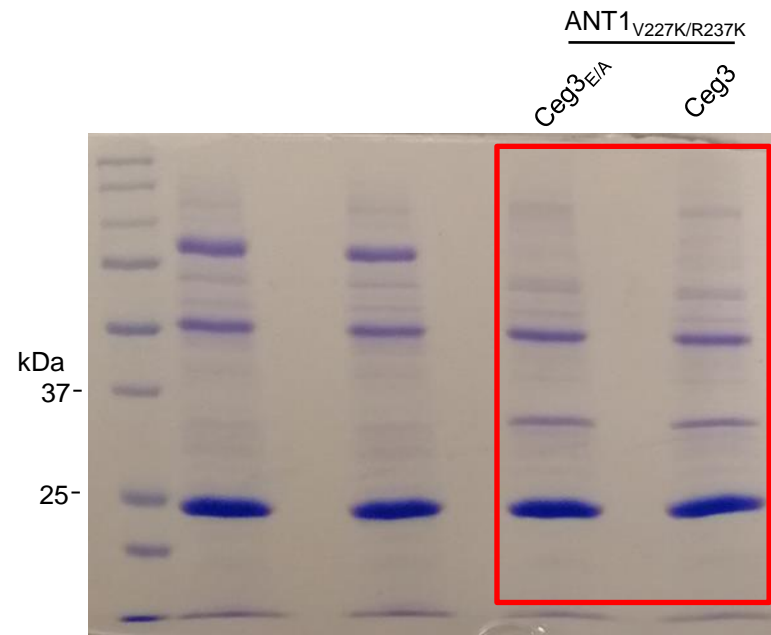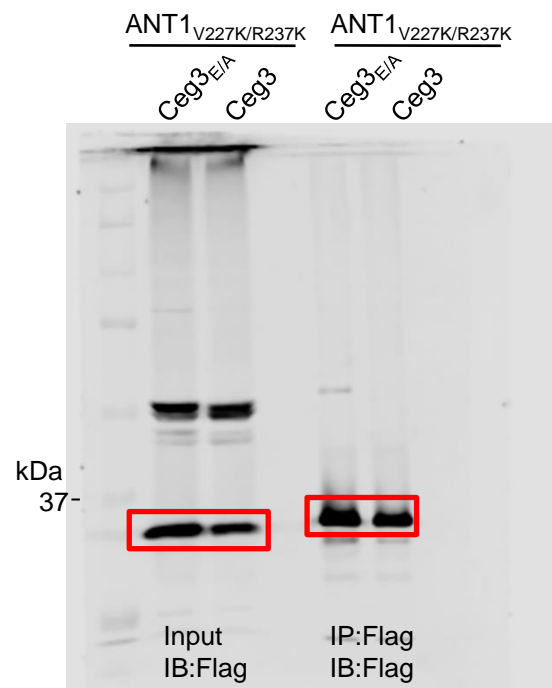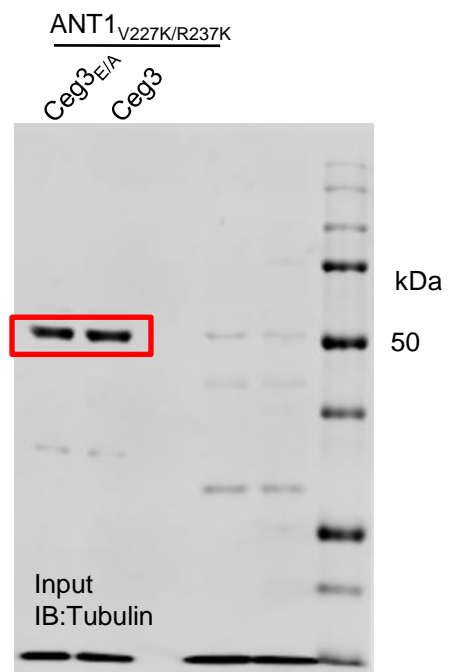



Figure 3-figure supplement 3 source data

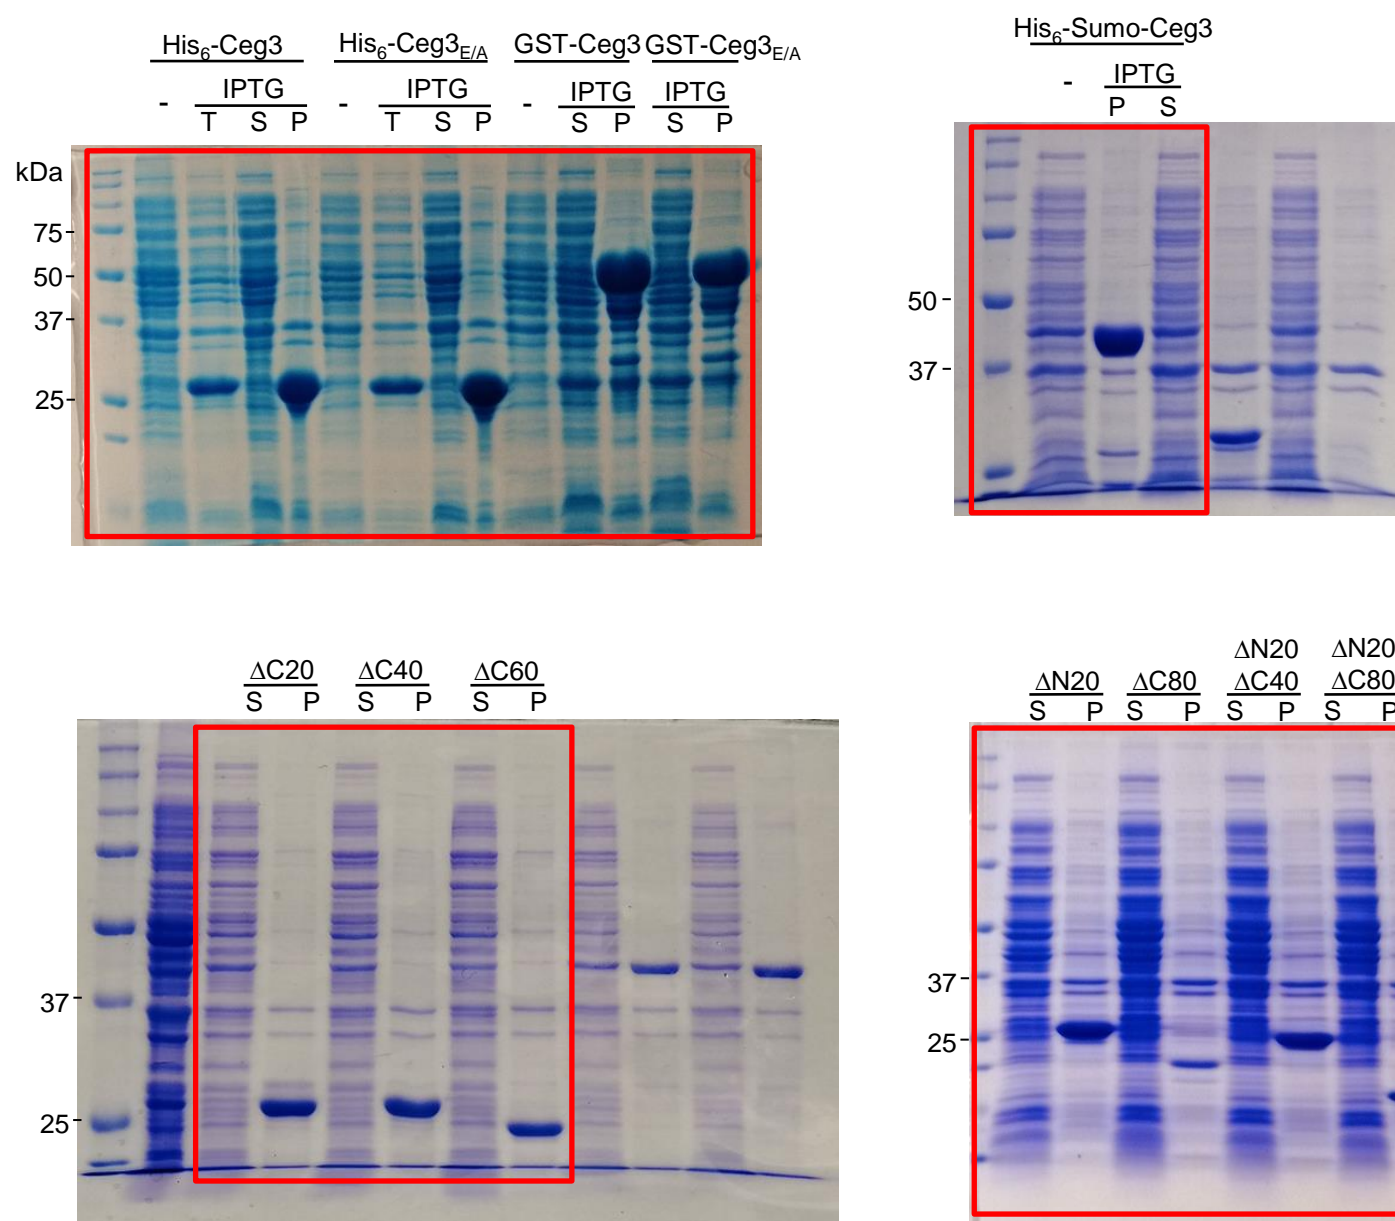

Figure 3-figure supplement 4 source data

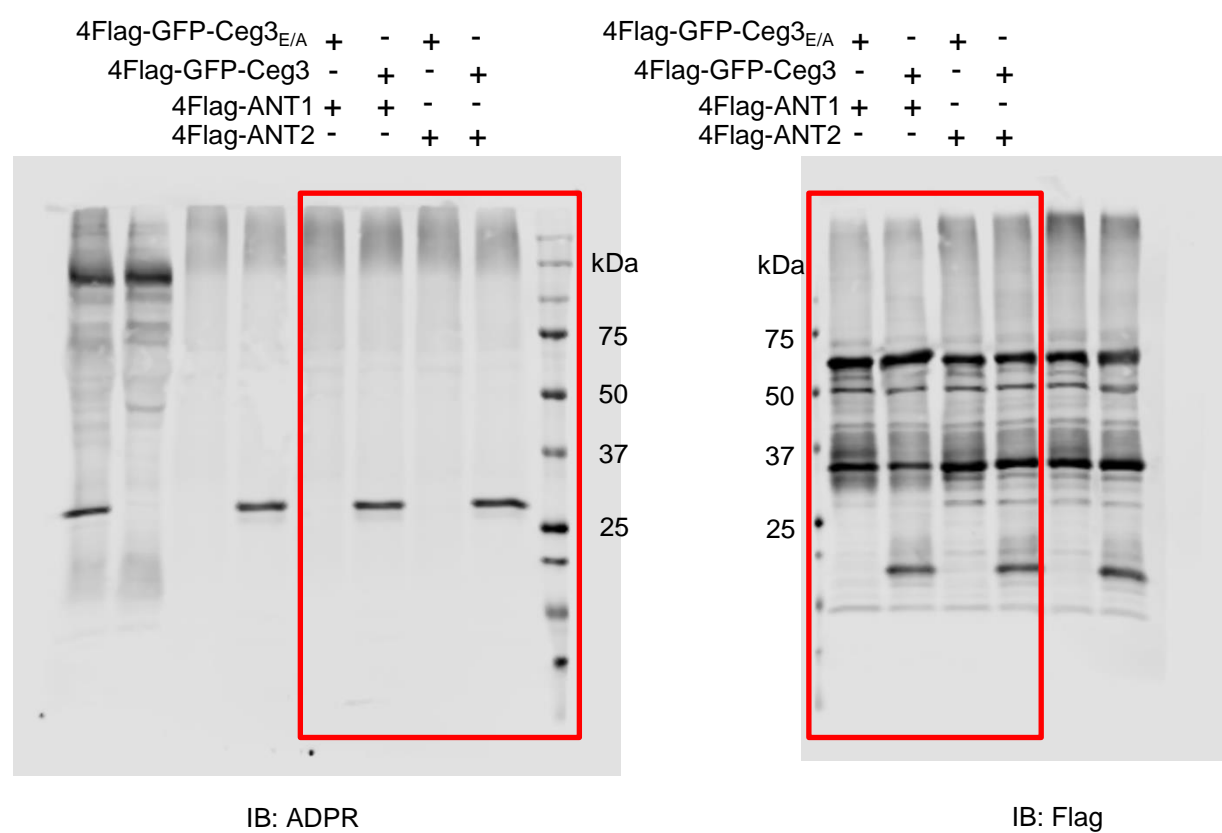



Figure 5-figure supplement 1A source data

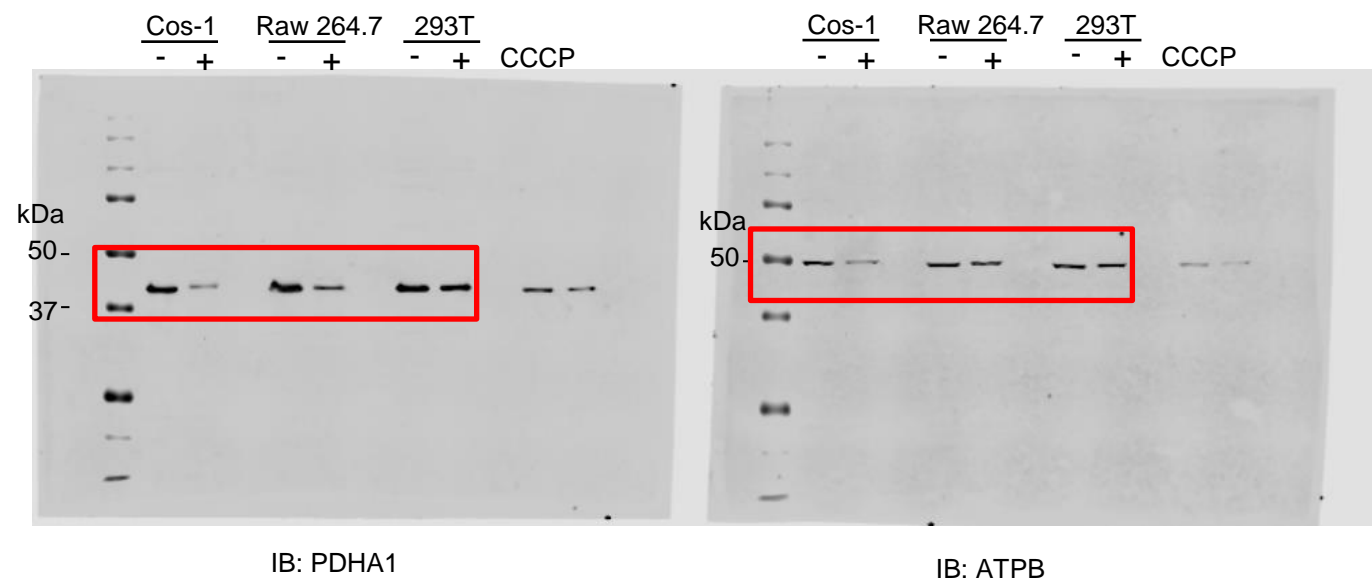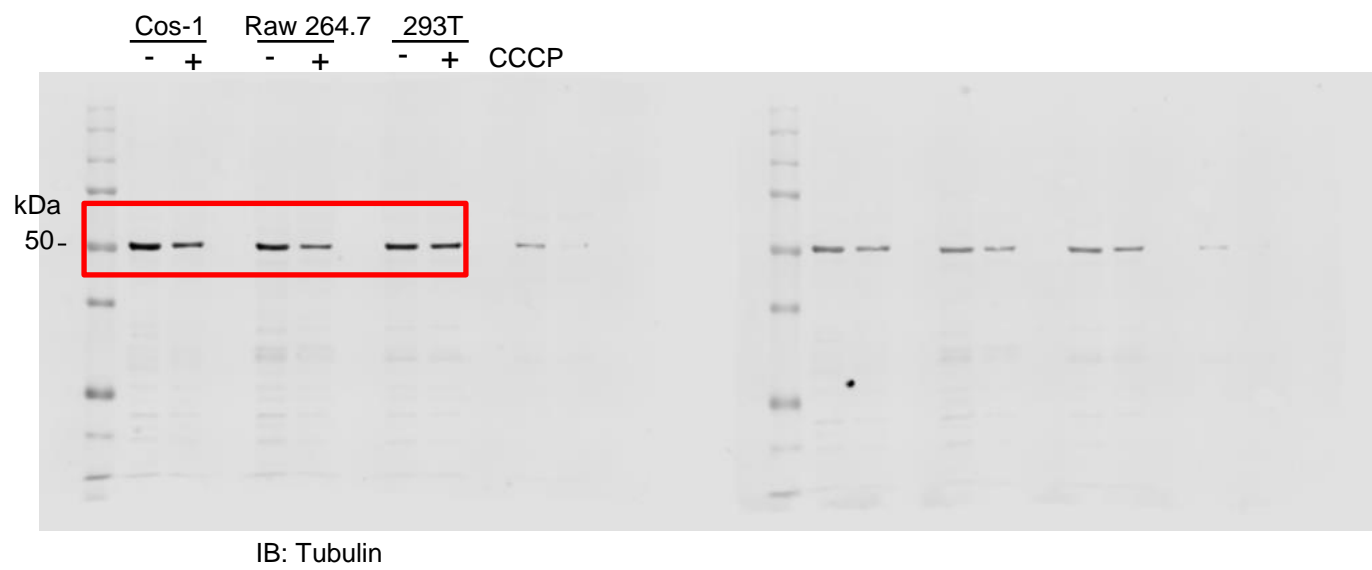

Figure 5-figure supplement 1B source data

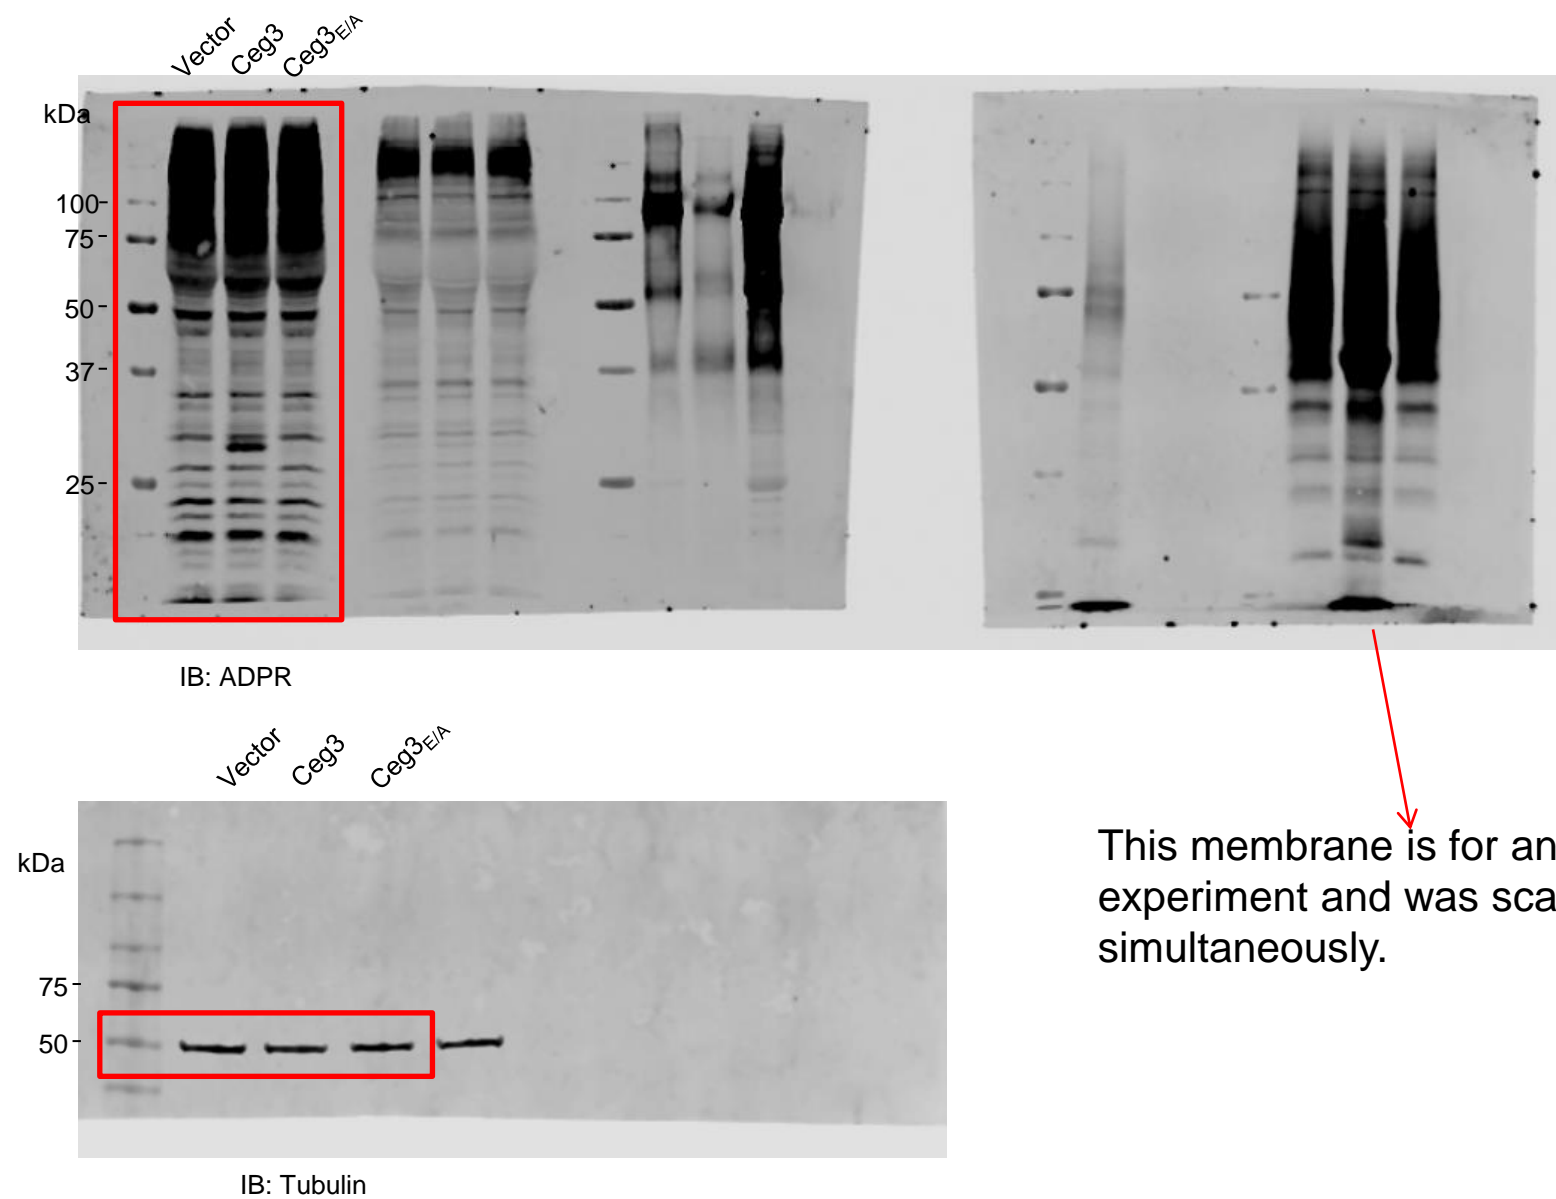

Figure 5-figure supplement 1C source data

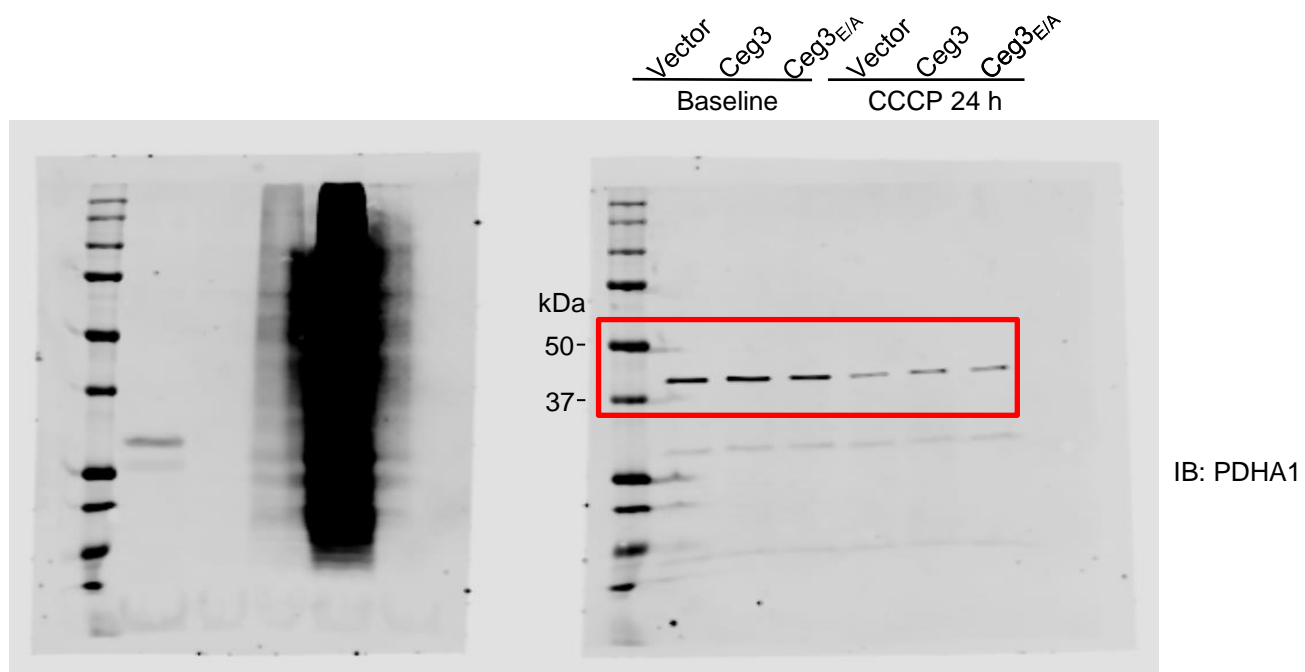

These membranes are for unrelated experiments and were scanned simultaneously.

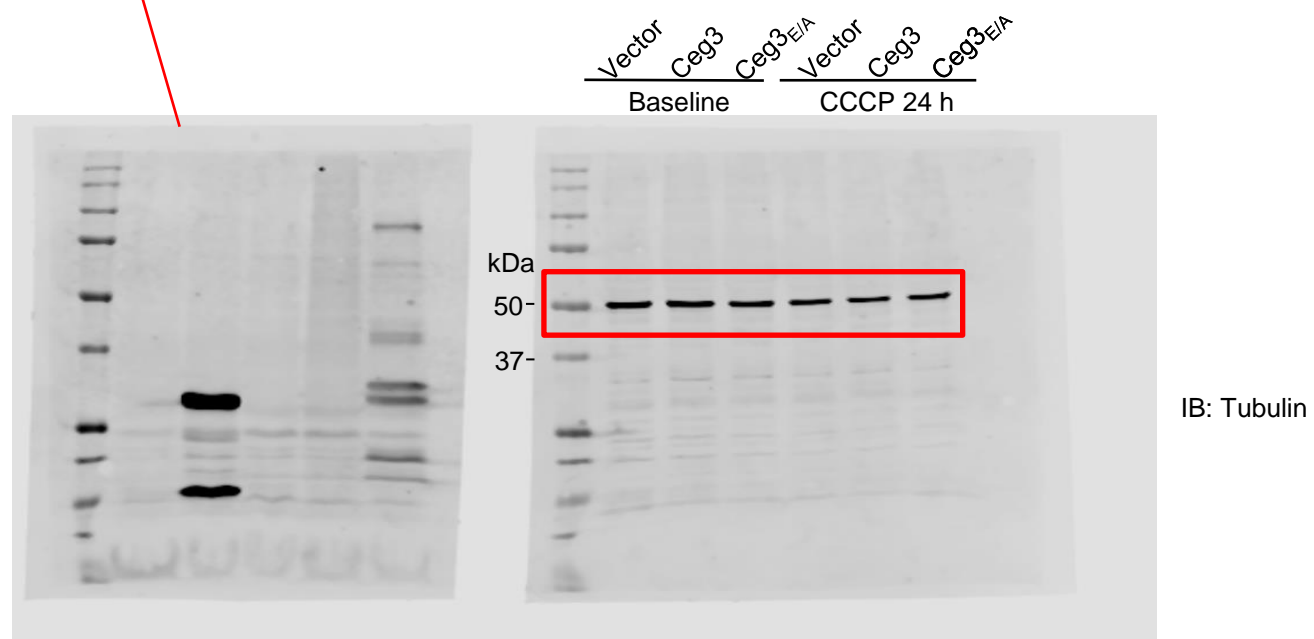

Supplement: supp [file elife-73611-supp-v1.zip]
